# Supplementary material for: Evaluation of Organic and Inorganic Foulant Interaction Using Modified Fouling Models in Constant Flux Dead-End Operation with Microfiltration Membranes
Source: MDPI journal article supplement (doi:10.3390/membranes13110853), 2023-10-25
Supplement: s1 [file s1]

# **Evaluation of organic and inorganic foulant interaction using modified fouling models in constant flux dead end operation with microfiltration membranes**

Muhammad Qasim<sup>1</sup>, Ali Akbar<sup>2</sup>, Imtiaz Afzal Khan<sup>3</sup>, Mumtaz Ali<sup>4</sup>, Eui-Jong Lee<sup>5</sup> and Kang Hoon Lee<sup>6\*</sup>

<sup>1</sup>Department of Civil Engineering, The University of Lahore, Lahore Campus, 1-km defense road, Lahore, Pakistan; Muhammad.qasim@ce.uol.edu.pk

<sup>2</sup>Department of Mechanical Engineering, University of Engineering and Technology Lahore (Rachna Campus), Pakistan; ali.akbar@uet.edu.pk

<sup>3</sup>Interdisciplinary Research Center for Membranes and Water Security, King Fahd University of Petroleum & Minerals (KFUPM), Dhahran, 31261 Saudi Arabia; imtiaz.khan@kfupm.edu.sa

<sup>4</sup>Department of Textile Engineering, National Textile University, Faisalabad 37610, Pakistan; mumtaz@ntu.edu.pk

<sup>5</sup>Department of Environmental Engineering, Daegu University, 201 Daegudae-ro, Jillyang, Gyeongsan-si 38453, Republic of Korea; lujong@daegu.ac.kr

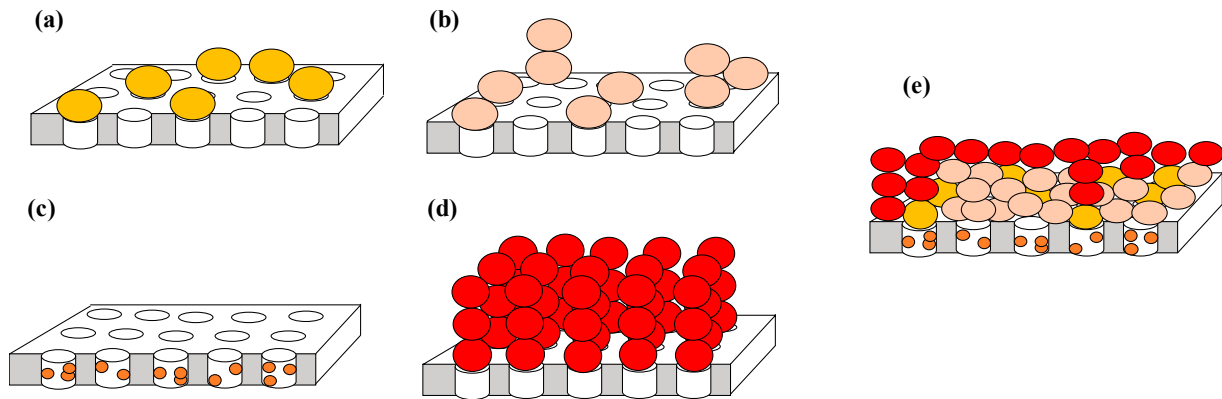

**Fig S1.** Schematic representation of Hermia's fouling model mechanisms: (a) complete fouling, (b) intermediate fouling, (c) standard fouling, (d) cake layer fouling and (e) combined fouling model distribution during the process

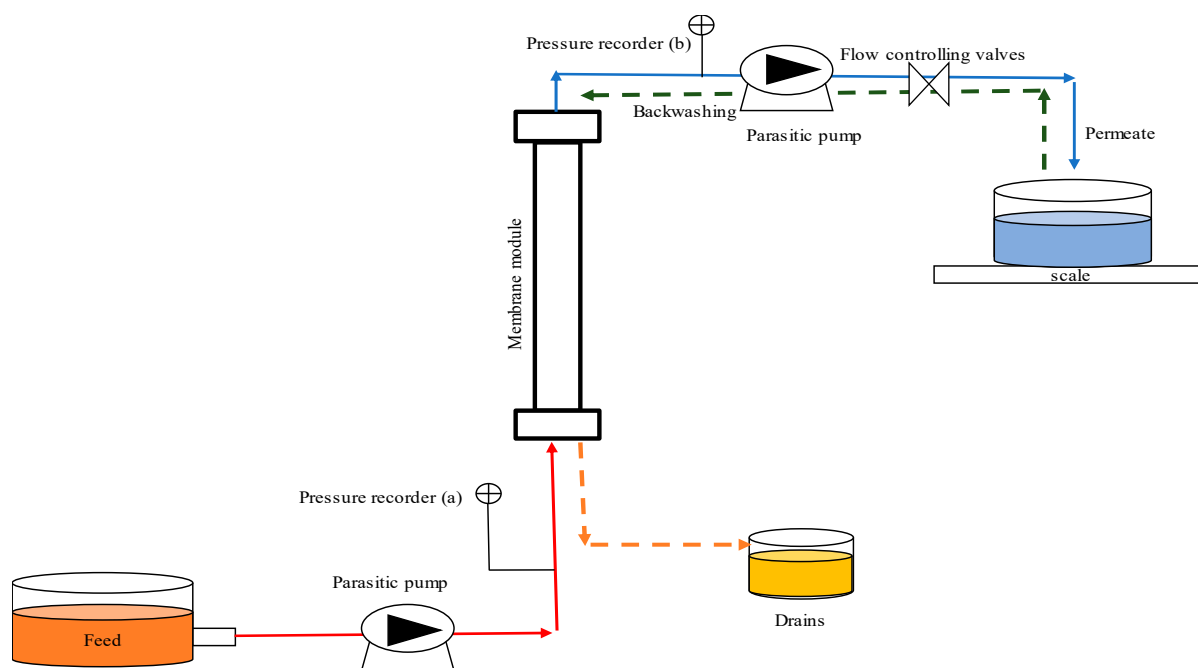

**Fig S2:** Lab scale membrane system

**Table S1:** PVDF membrane characteristics and operational conditions

| Parameters            | Detail                    |
|-----------------------|---------------------------|
| Membrane pore size    | 0.1 $\mu\text{m}$         |
| Outer diameter        | 1.4mm                     |
| Inner diameter        | 0.6mm                     |
| Membrane area         | 0.1884m <sup>2</sup>      |
| pH                    | 8.5-9.5                   |
| Operating temperature | 18 $\pm$ 3 <sup>0</sup> C |
| Flux range            | 40-200 lmh                |

**Table S2:** Feed solution characteristics

| Sample name | Feed solution                               | Particle size ( $\mu\text{m}$ ) |
|-------------|---------------------------------------------|---------------------------------|
| S1          | HA + Ca <sup>+2</sup>                       | 0.213 $\pm$ 0.11                |
| S2          | Al + Mn + Fe + Ca <sup>+2</sup> +Kaolin     | 0.156 $\pm$ 0.08                |
| S3          | HA+ Al + Mn + Fe + Ca <sup>+2</sup> +Kaolin | 0.268 $\pm$ 0.13                |



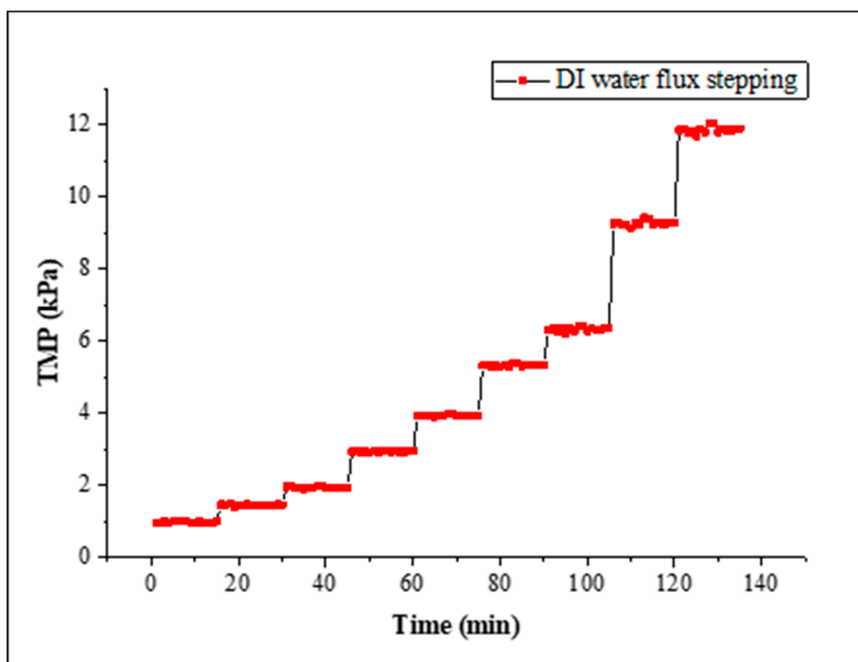

**Fig. S3 :** Raise in TMP of membrane under testing for raise in flux with 20 LMH from 40 – 200 LMH for DI water.

# 1. Fitting curves for modified fouling model for the 40lmh 1.1.1hr filtration

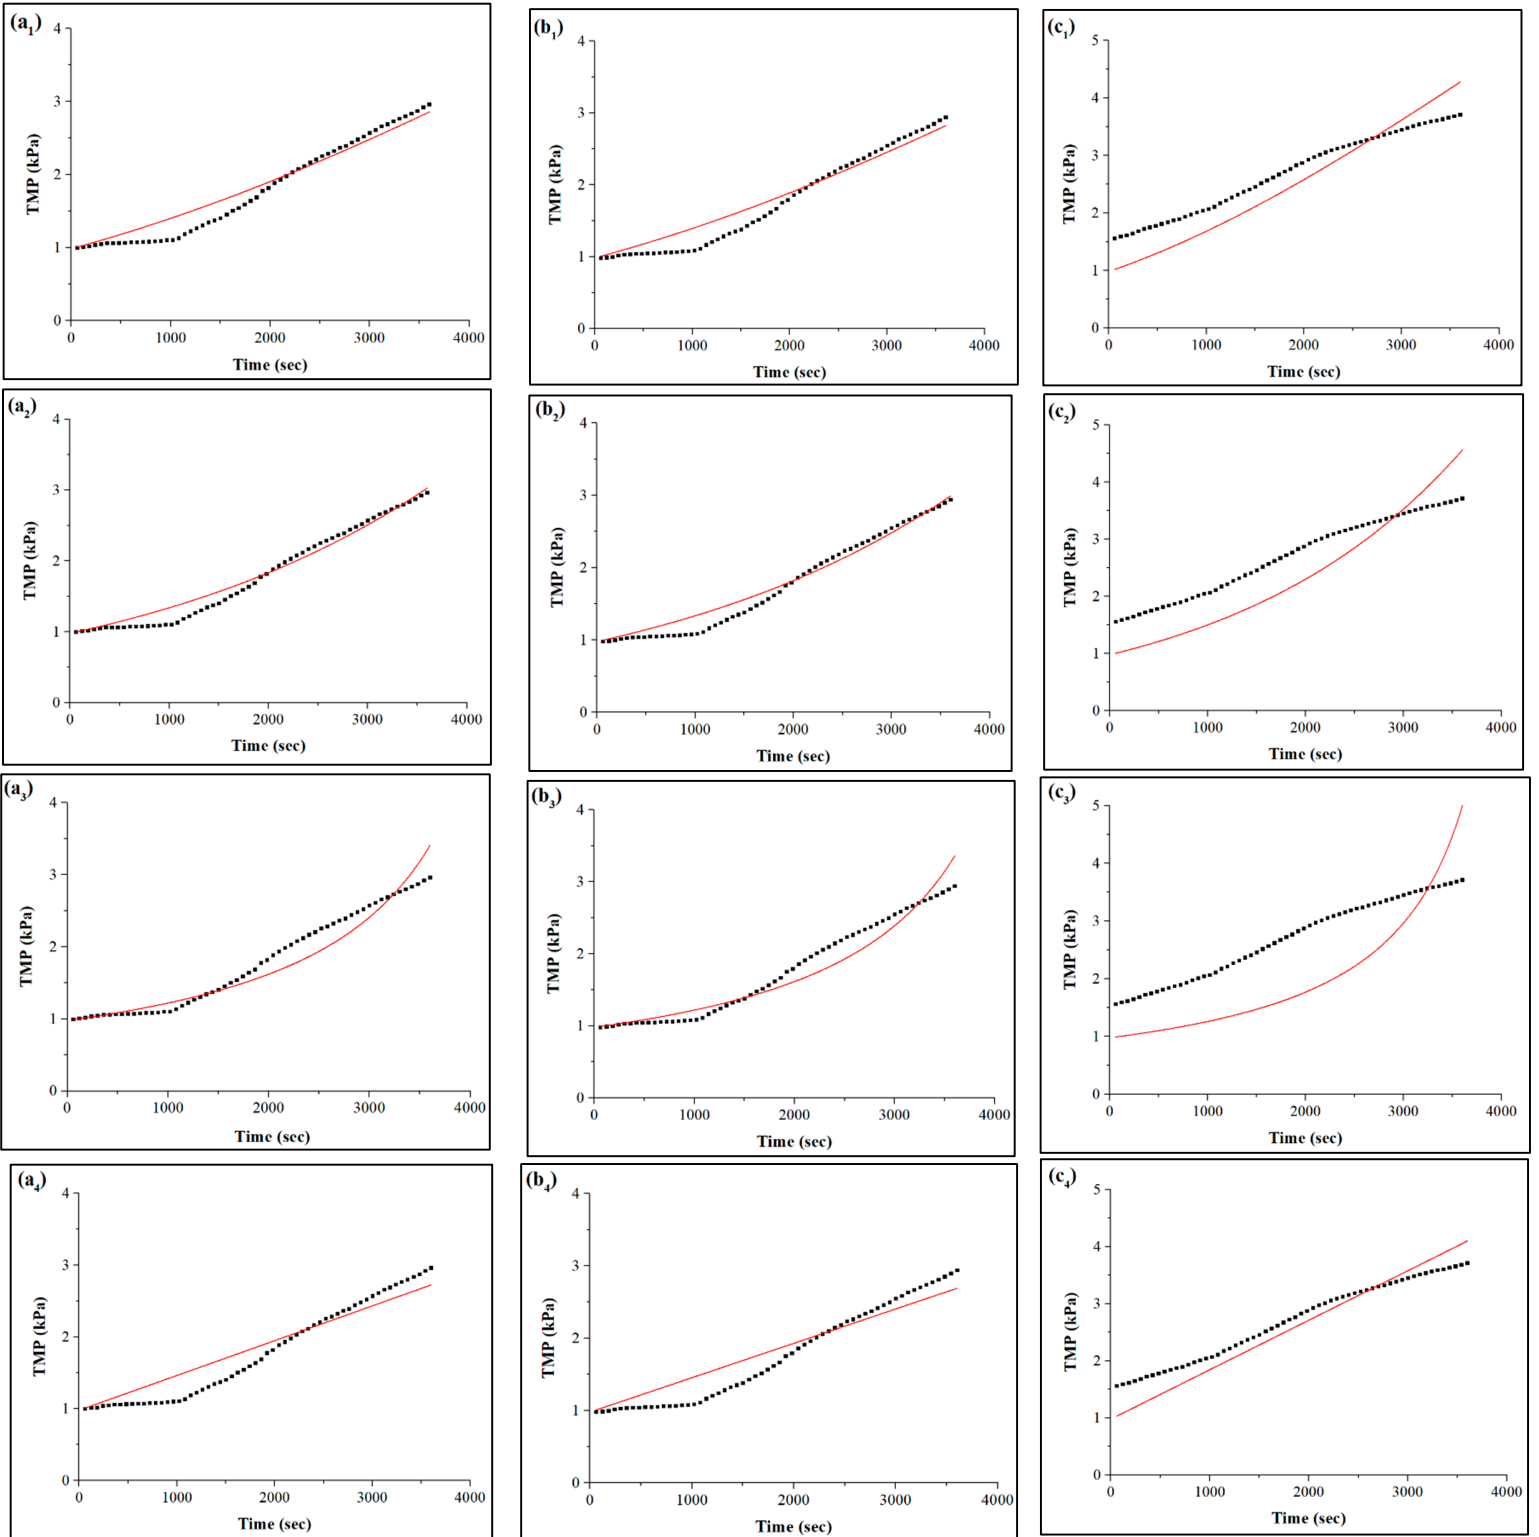

**Fig. S4:** Represents the fitted fouling curve for the fouling solution at 40lmh for 1hr filtration; a: S1 solution; b: S2 solution; c: S3 solution (subscript 1,2,3 & 4 represents complete, intermediate, standard and cake layer blocking)

## 1.2.Cycle 1 filtration (40lmh)

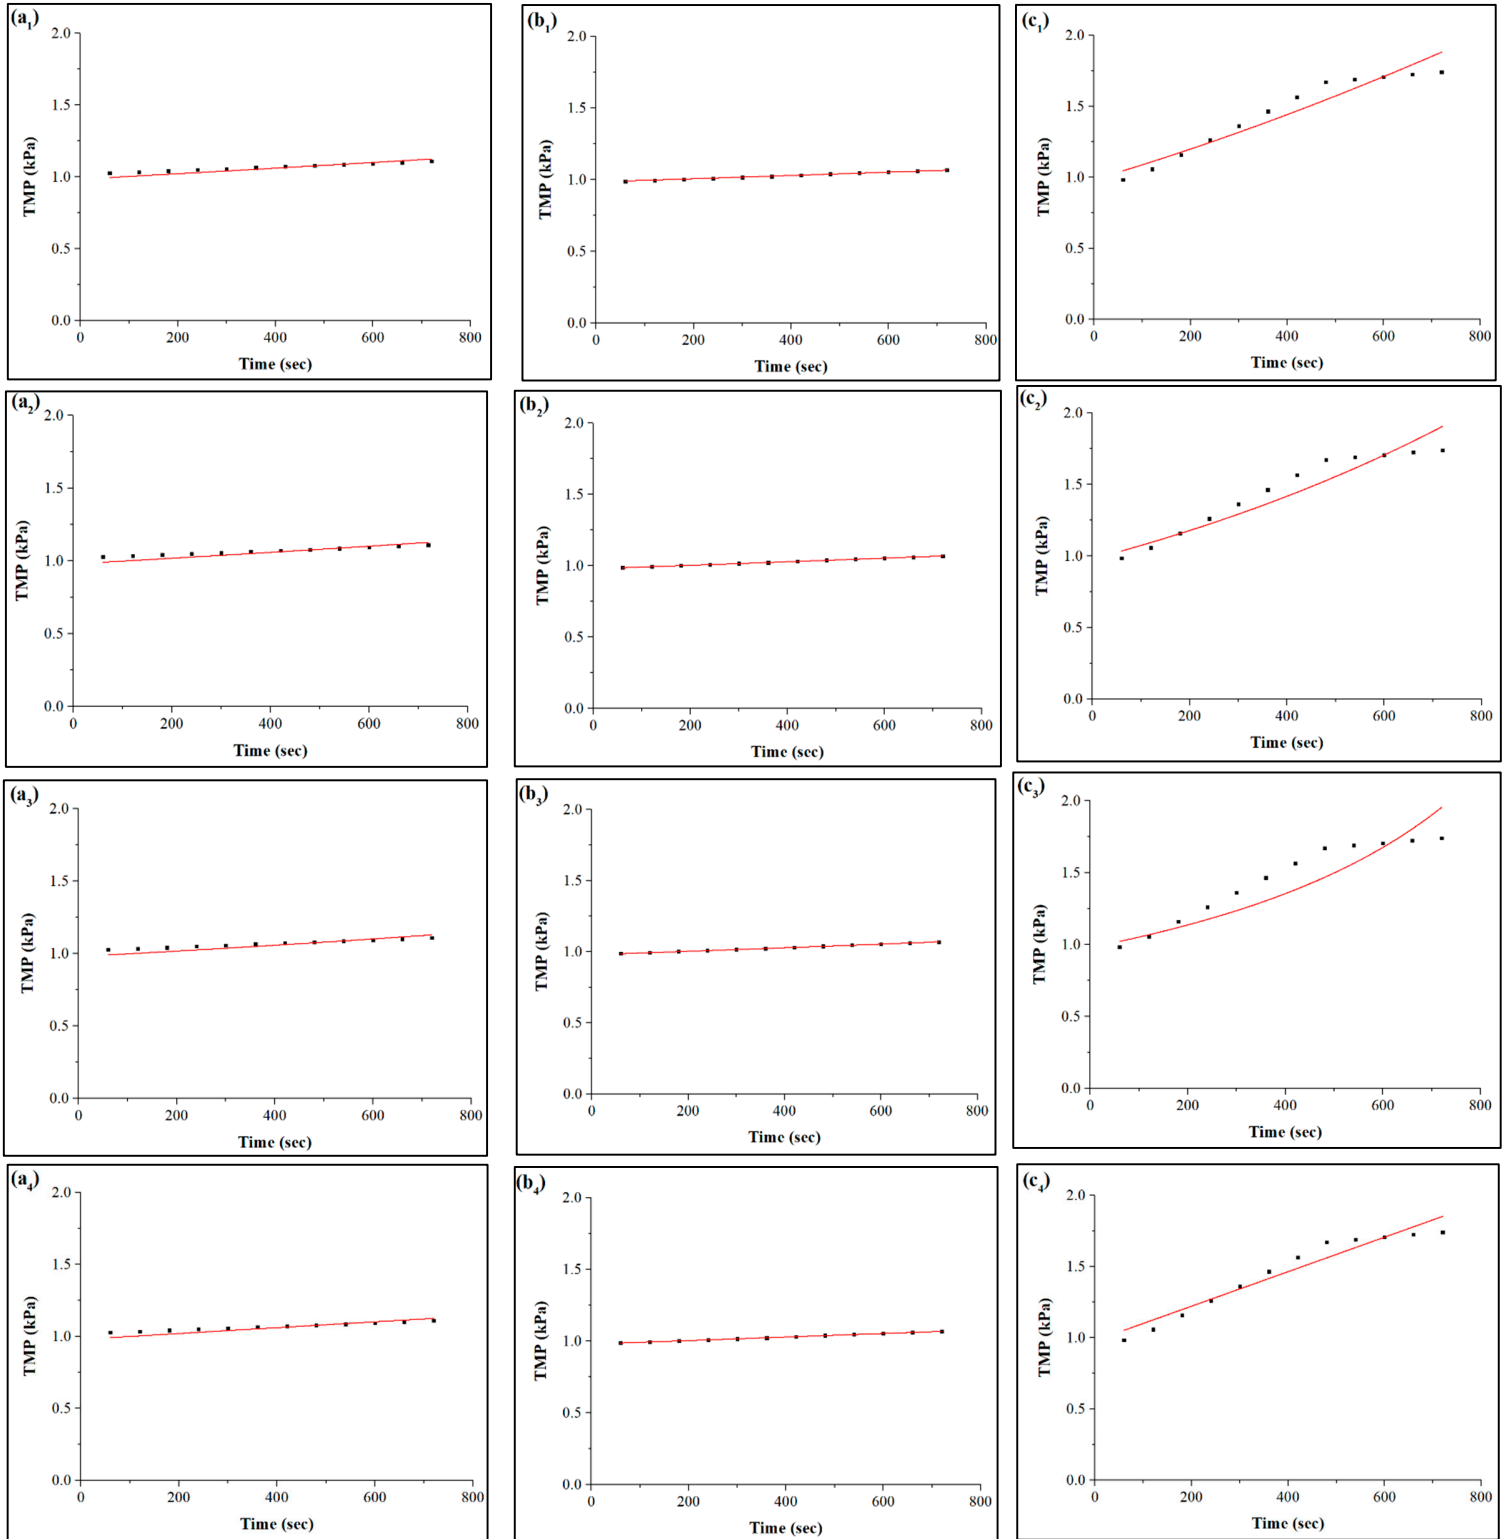

**Fig. S5:** Represents the fitted fouling curve for the fouling solution at 40lmh for cycle 1 filtration; a: S1 solution; b: S2 solution; c: S3 solution (subscript 1,2,3 & 4 represents complete, intermediate, standard and cake layer blocking)

### 1.3.Cycle 2 filtration (40 lmh)

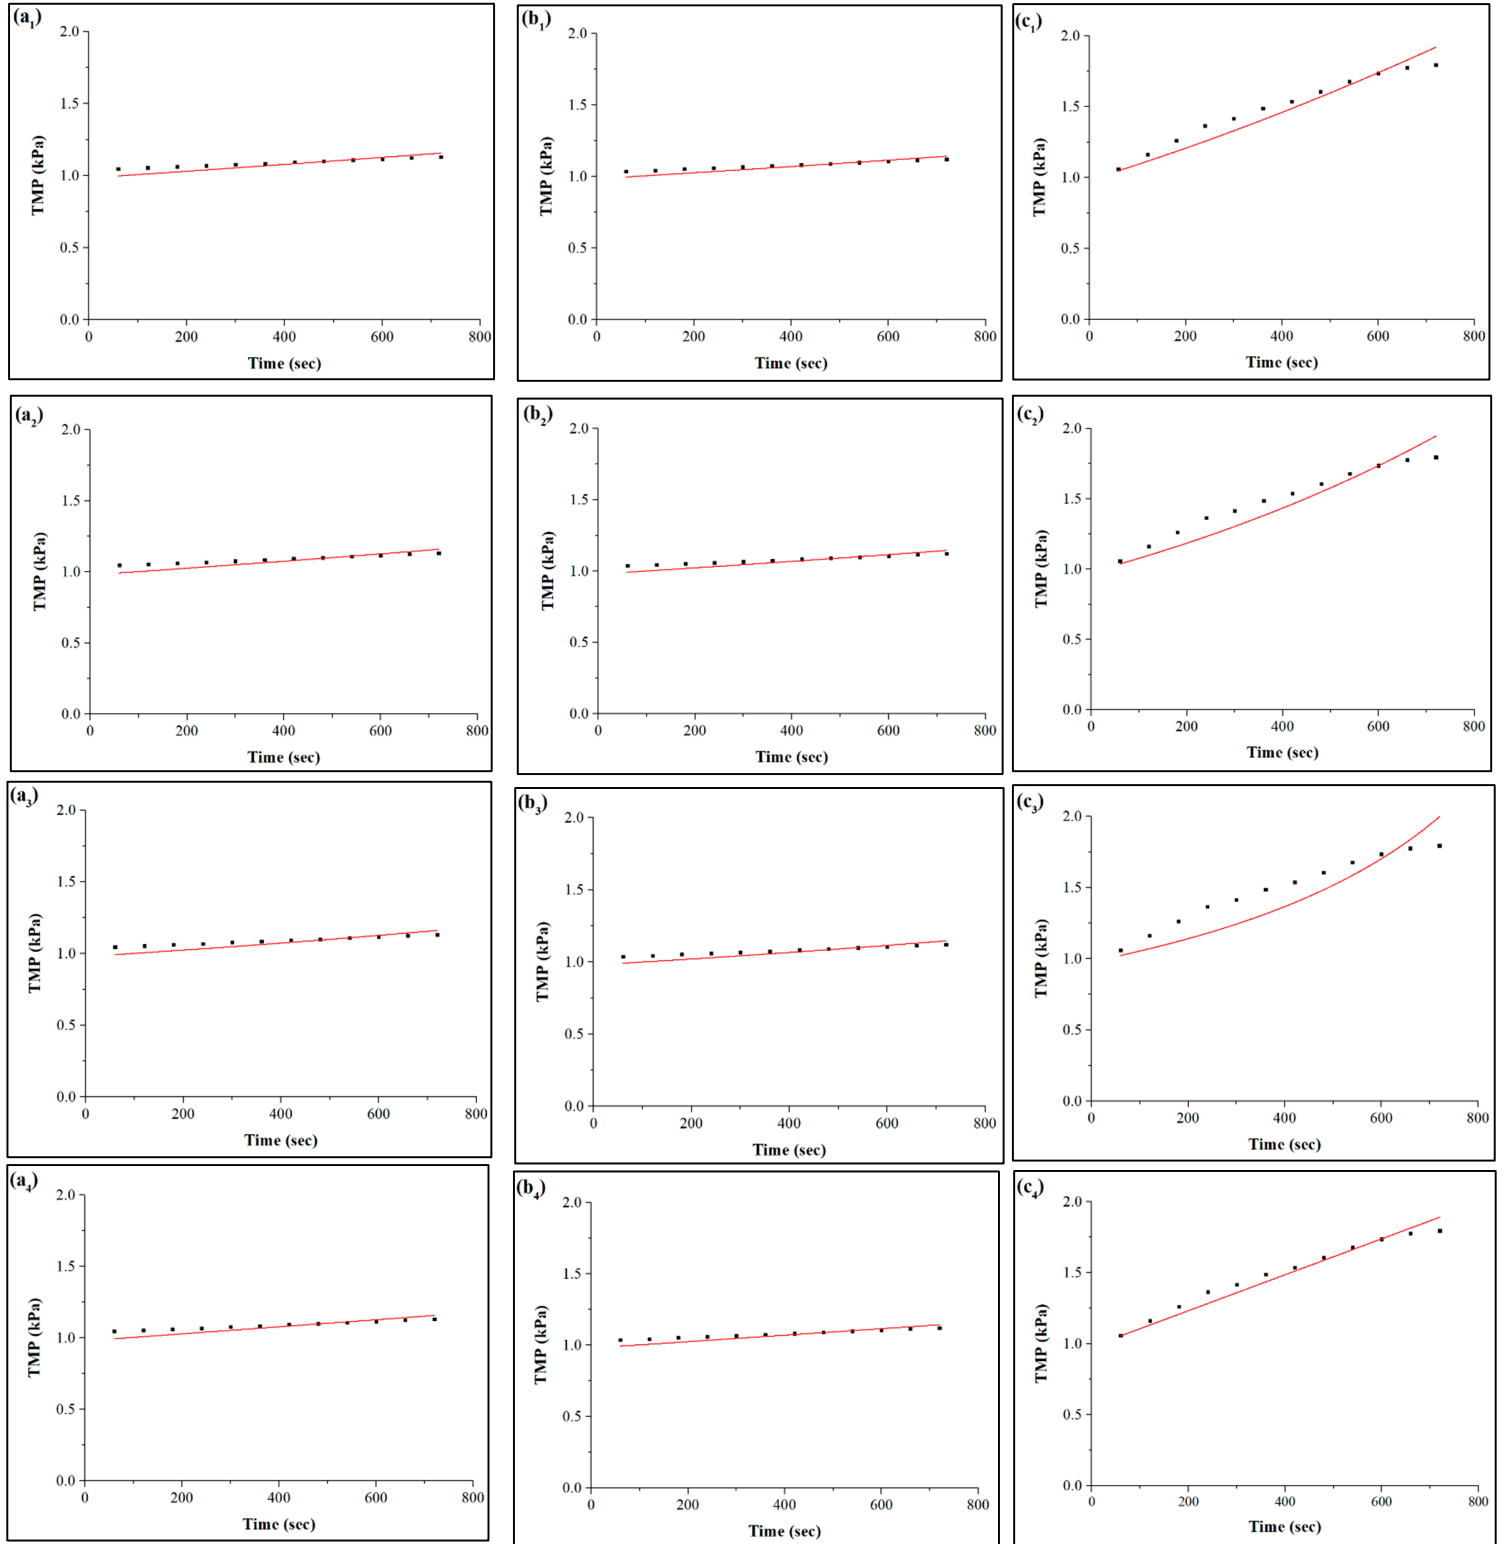

**Fig. S6:** Represents the fitted fouling curve for the fouling solution at 40lmh for cycle 2 filtration; a: S1 solution; b: S2 solution; c: S3 solution (subscript 1,2,3 & 4 represents complete, intermediate, standard and cake layer blocking)

#### 1.4.Cycle 3 filtration (40lmh)

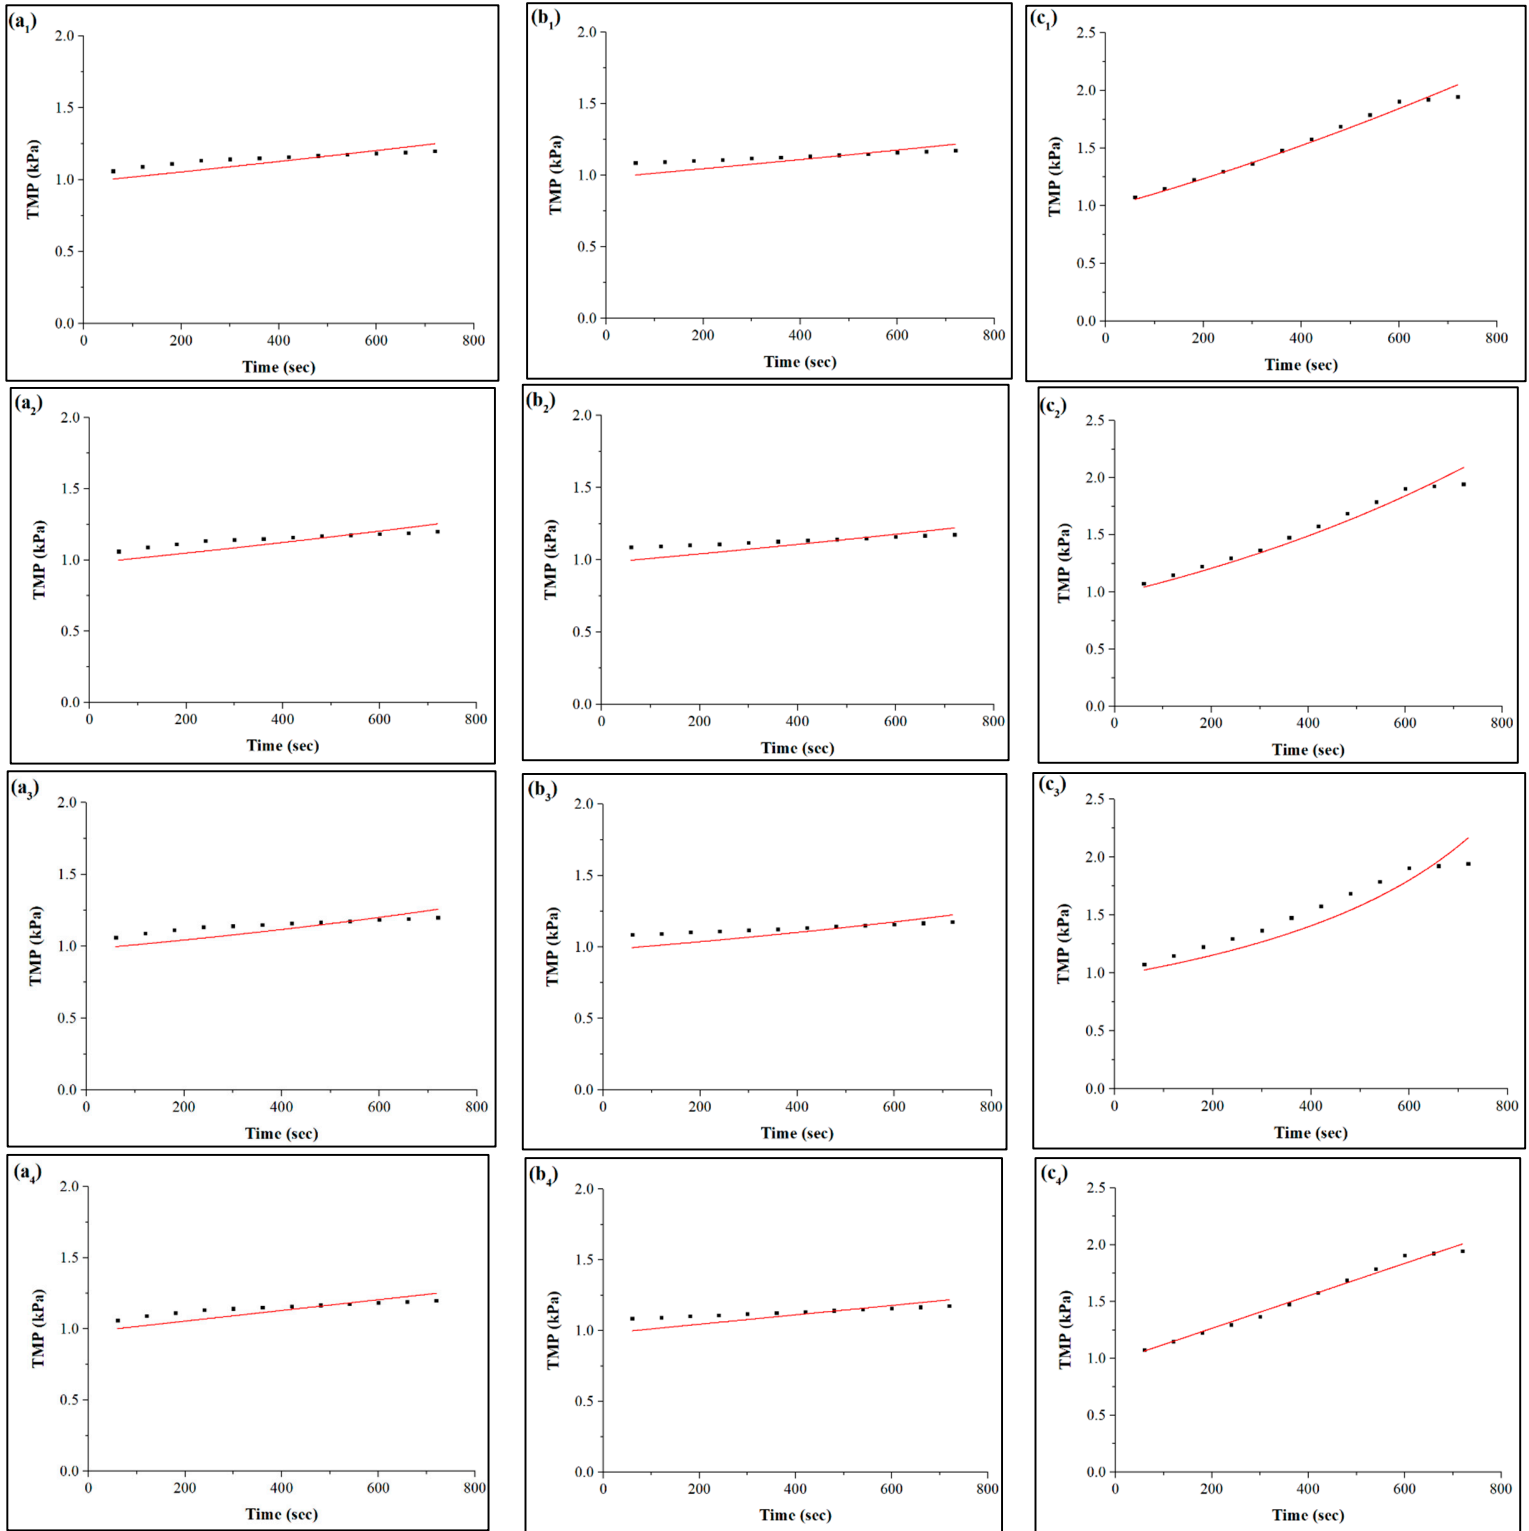

**Fig. S7:** Represents the fitted fouling curve for the fouling solution at 40lmh for cycle 3 filtration; a: S1 solution; b: S2 solution; c: S3 solution (subscript 1,2,3 & 4 represents complete, intermediate, standard and cake layer blocking)

## 2. Fitting curves for modified fouling model for the 80lmh

### 2.1. 1hr filtration

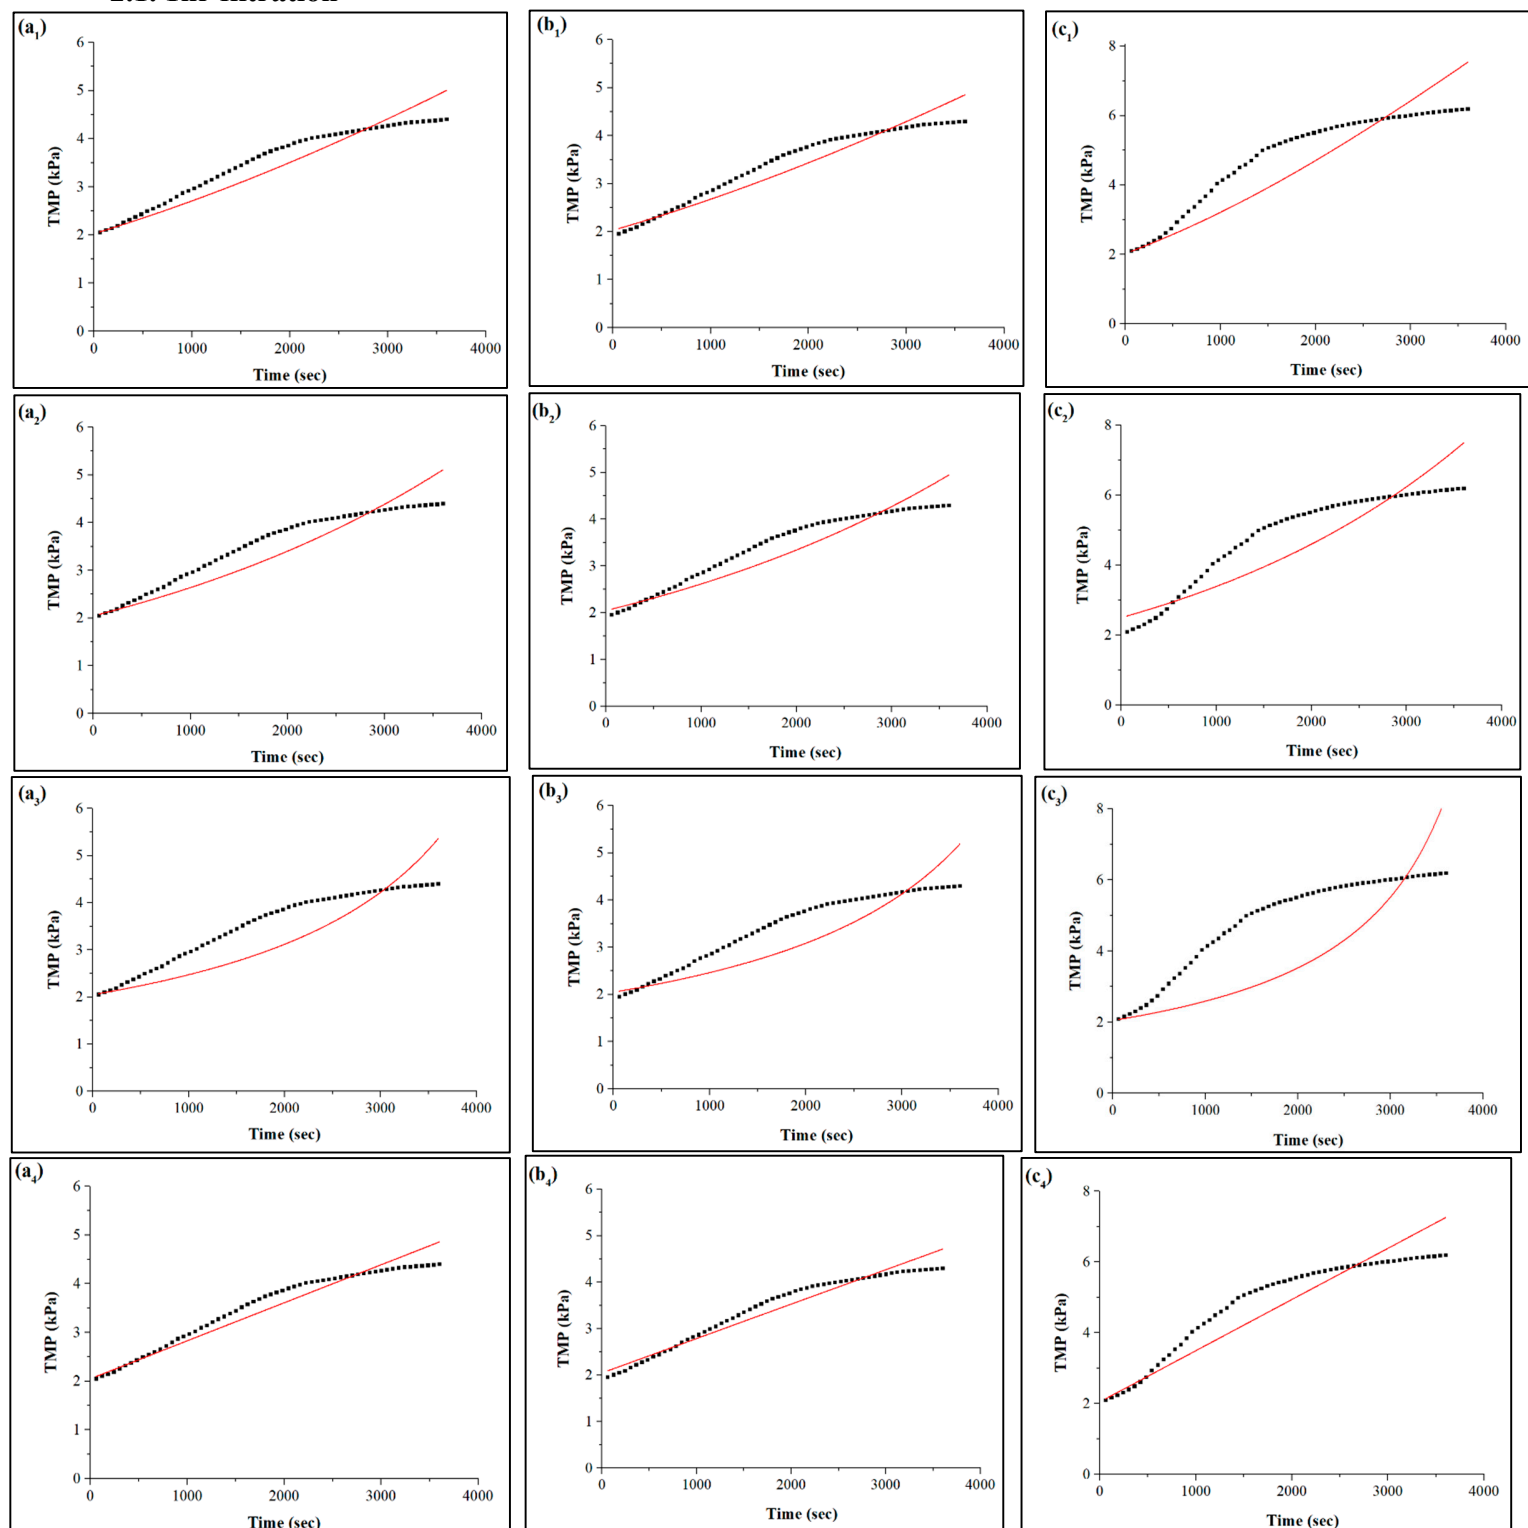

**Fig. S8:** Represents the fitted fouling curve for the fouling solution at 80lmh for 1hr filtration; a: S1 solution; b: S2 solution; c: S3 solution (subscript 1,2,3 & 4 represents complete, intermediate, standard and cake layer blocking)

## 2.2.Cycle 1filtration (80 lmh)

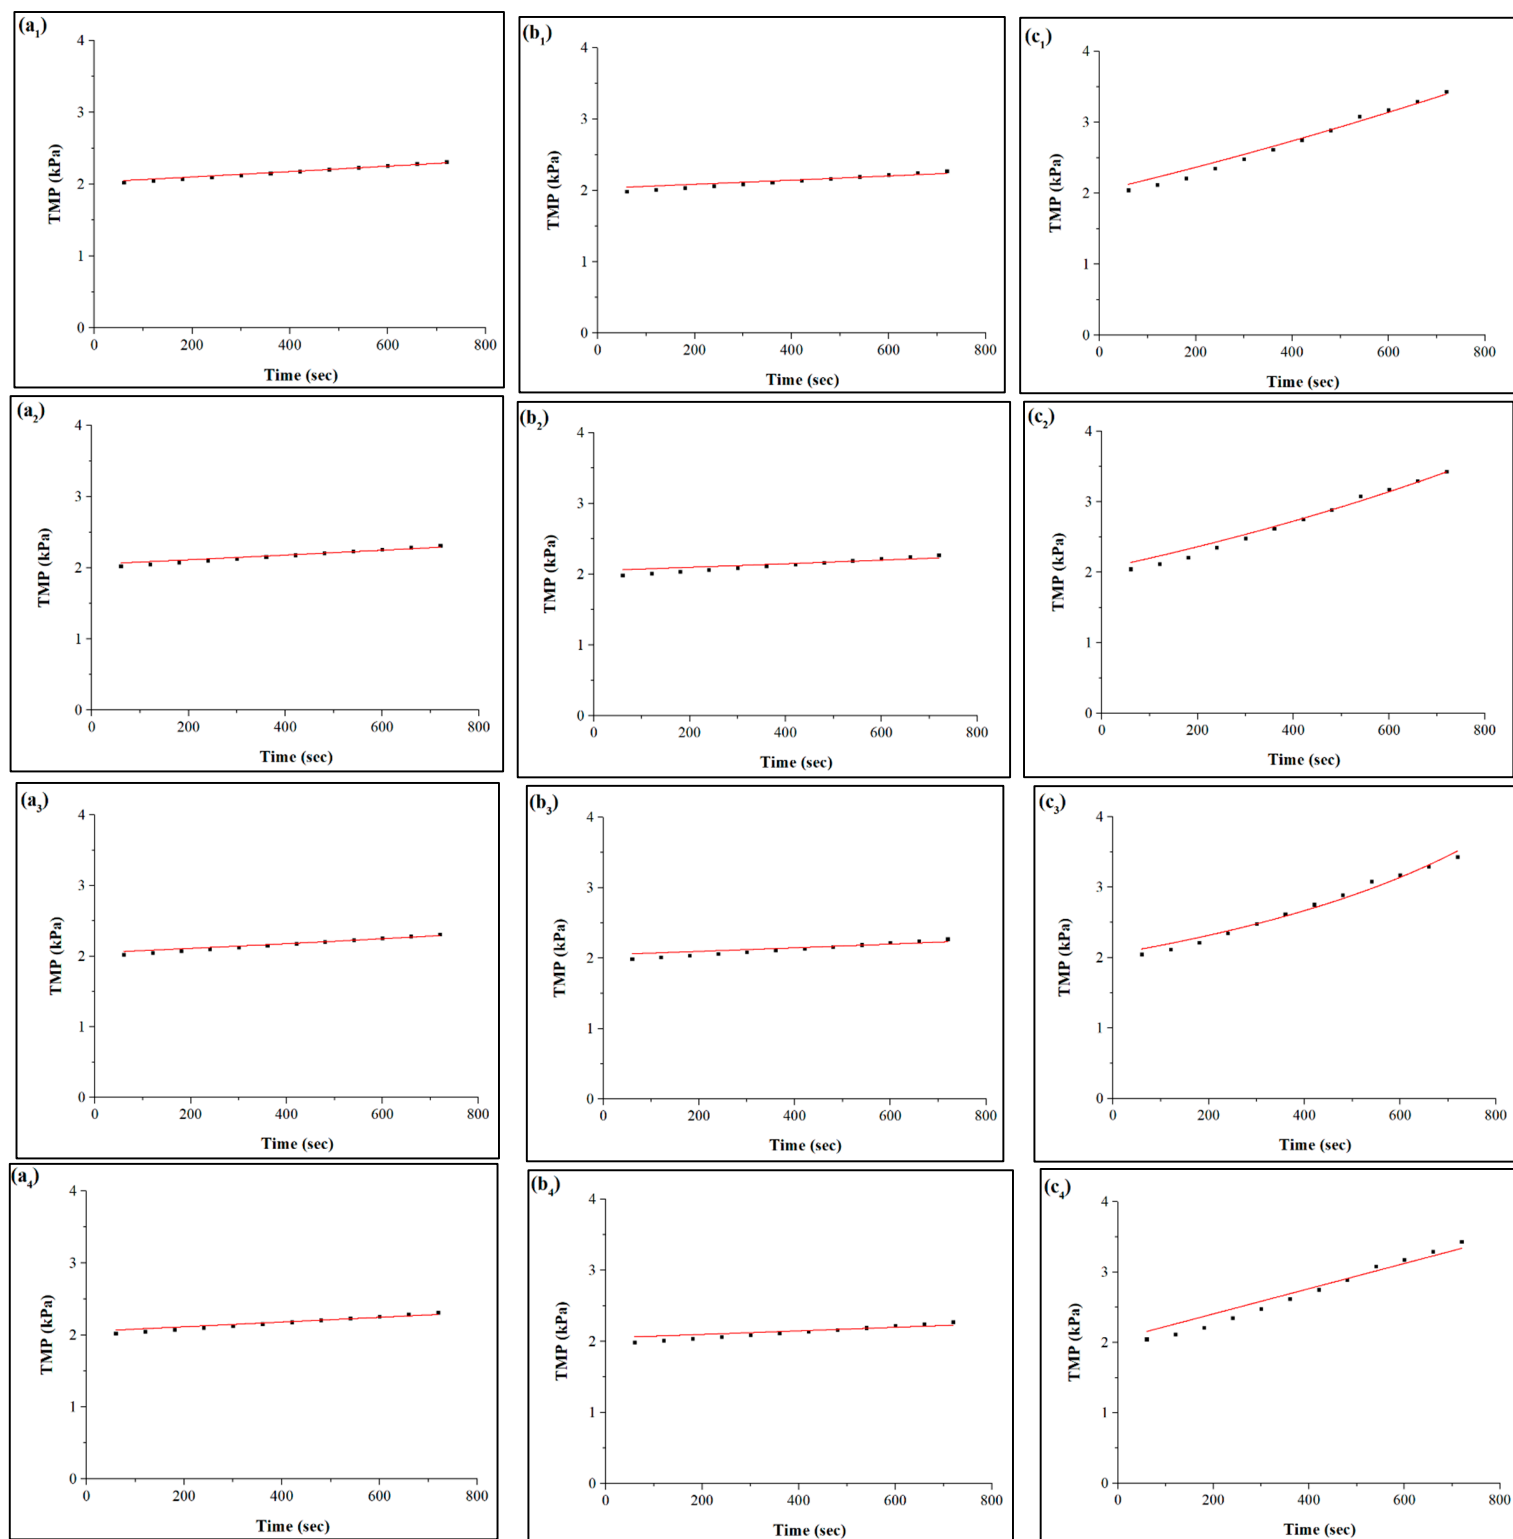

**Fig. S9:** Represents the fitted fouling curve for the fouling solution at 80lmh for cycle 1 filtration; a: S1 solution; b: S2 solution; c: S3 solution (subscript 1, 2,3 & 4 represents complete, intermediate, standard and cake layer blocking)

### 2.3. Cycle 2 filtration (80 lmh)

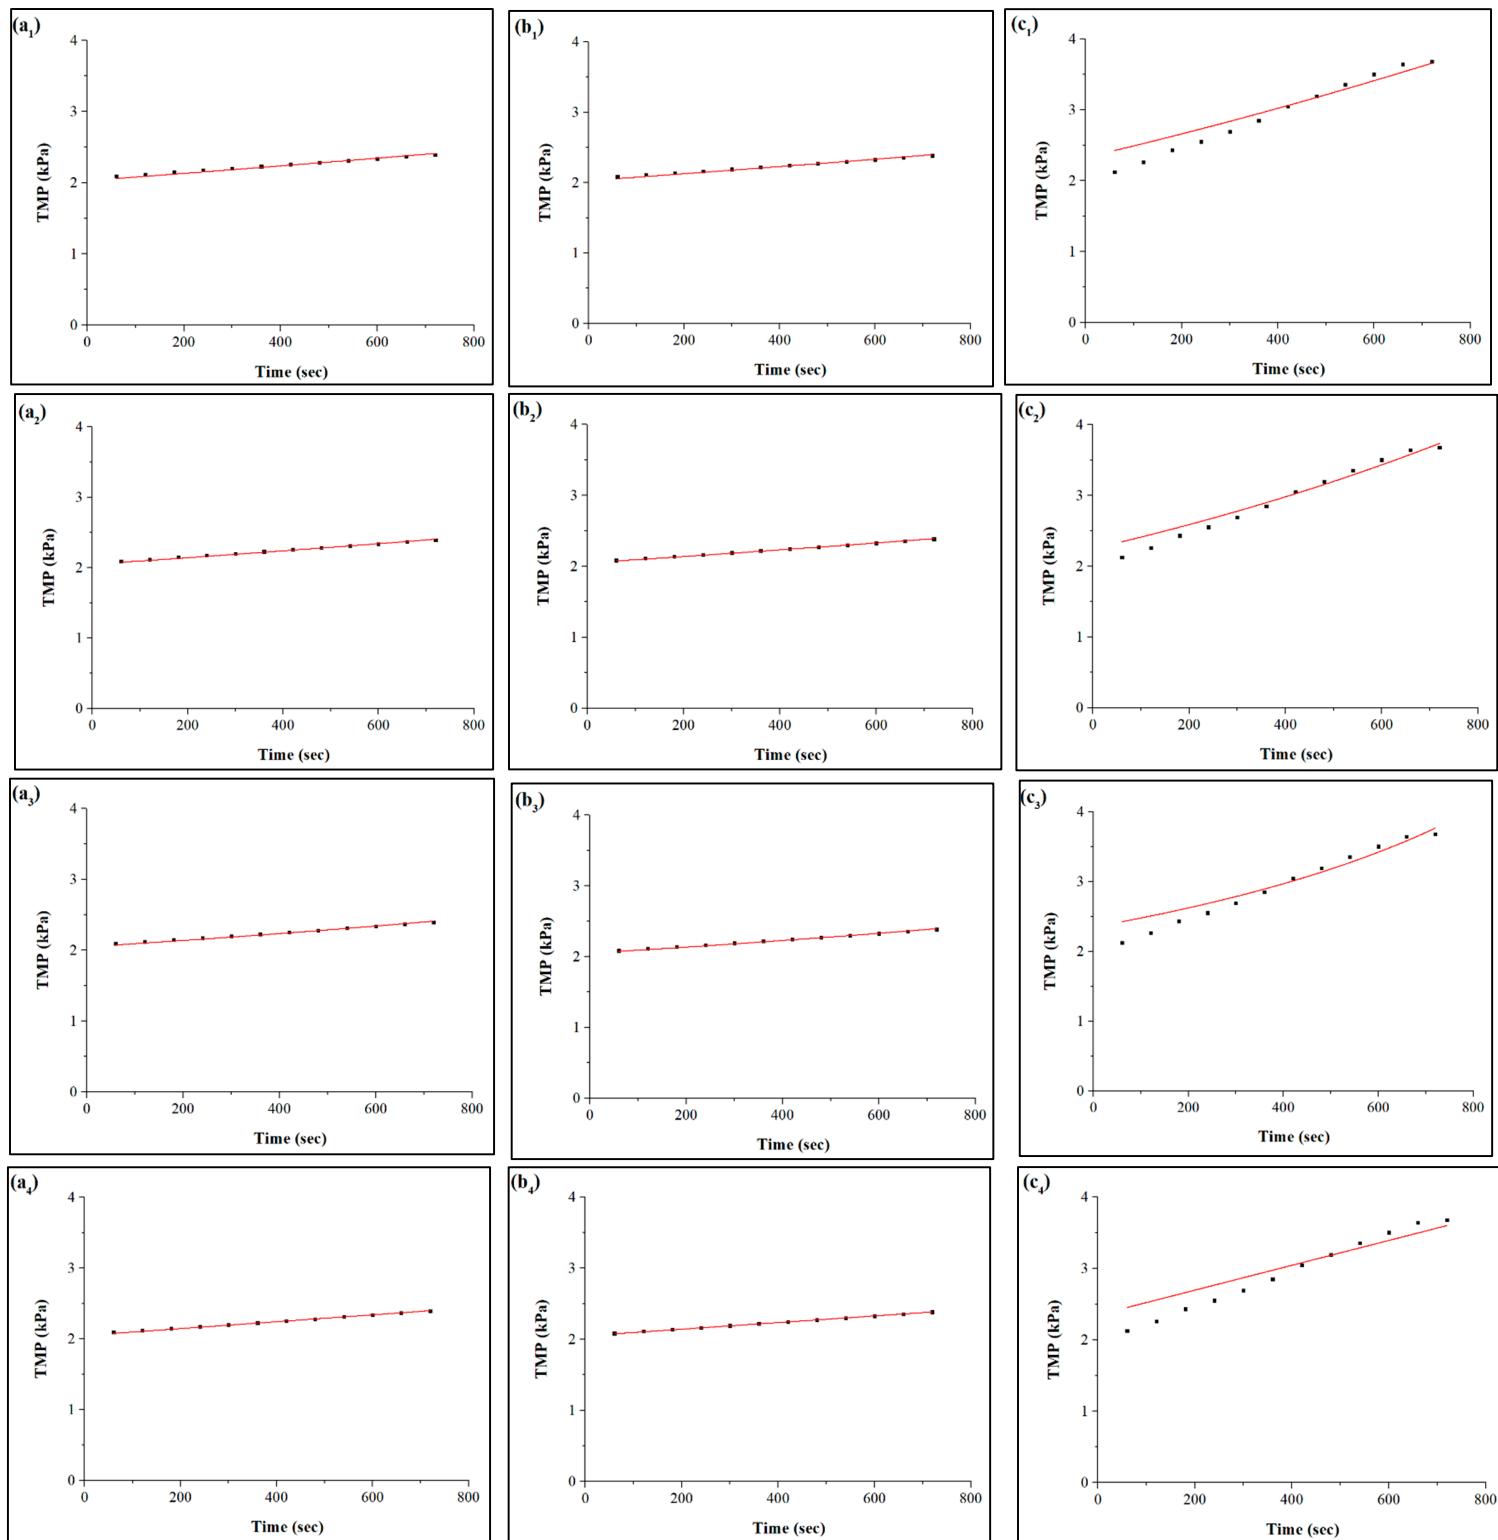

**Fig. S10:** Represents the fitted fouling curve for the fouling solution at 80lmh for cycle 2 filtration; a: S1 solution; b: S2 solution; c: S3 solution (subscript 1, 2,3 & 4 represents complete, intermediate, standard and cake layer blocking)



## 2.4. Cycle 3 filtration (80lmh)

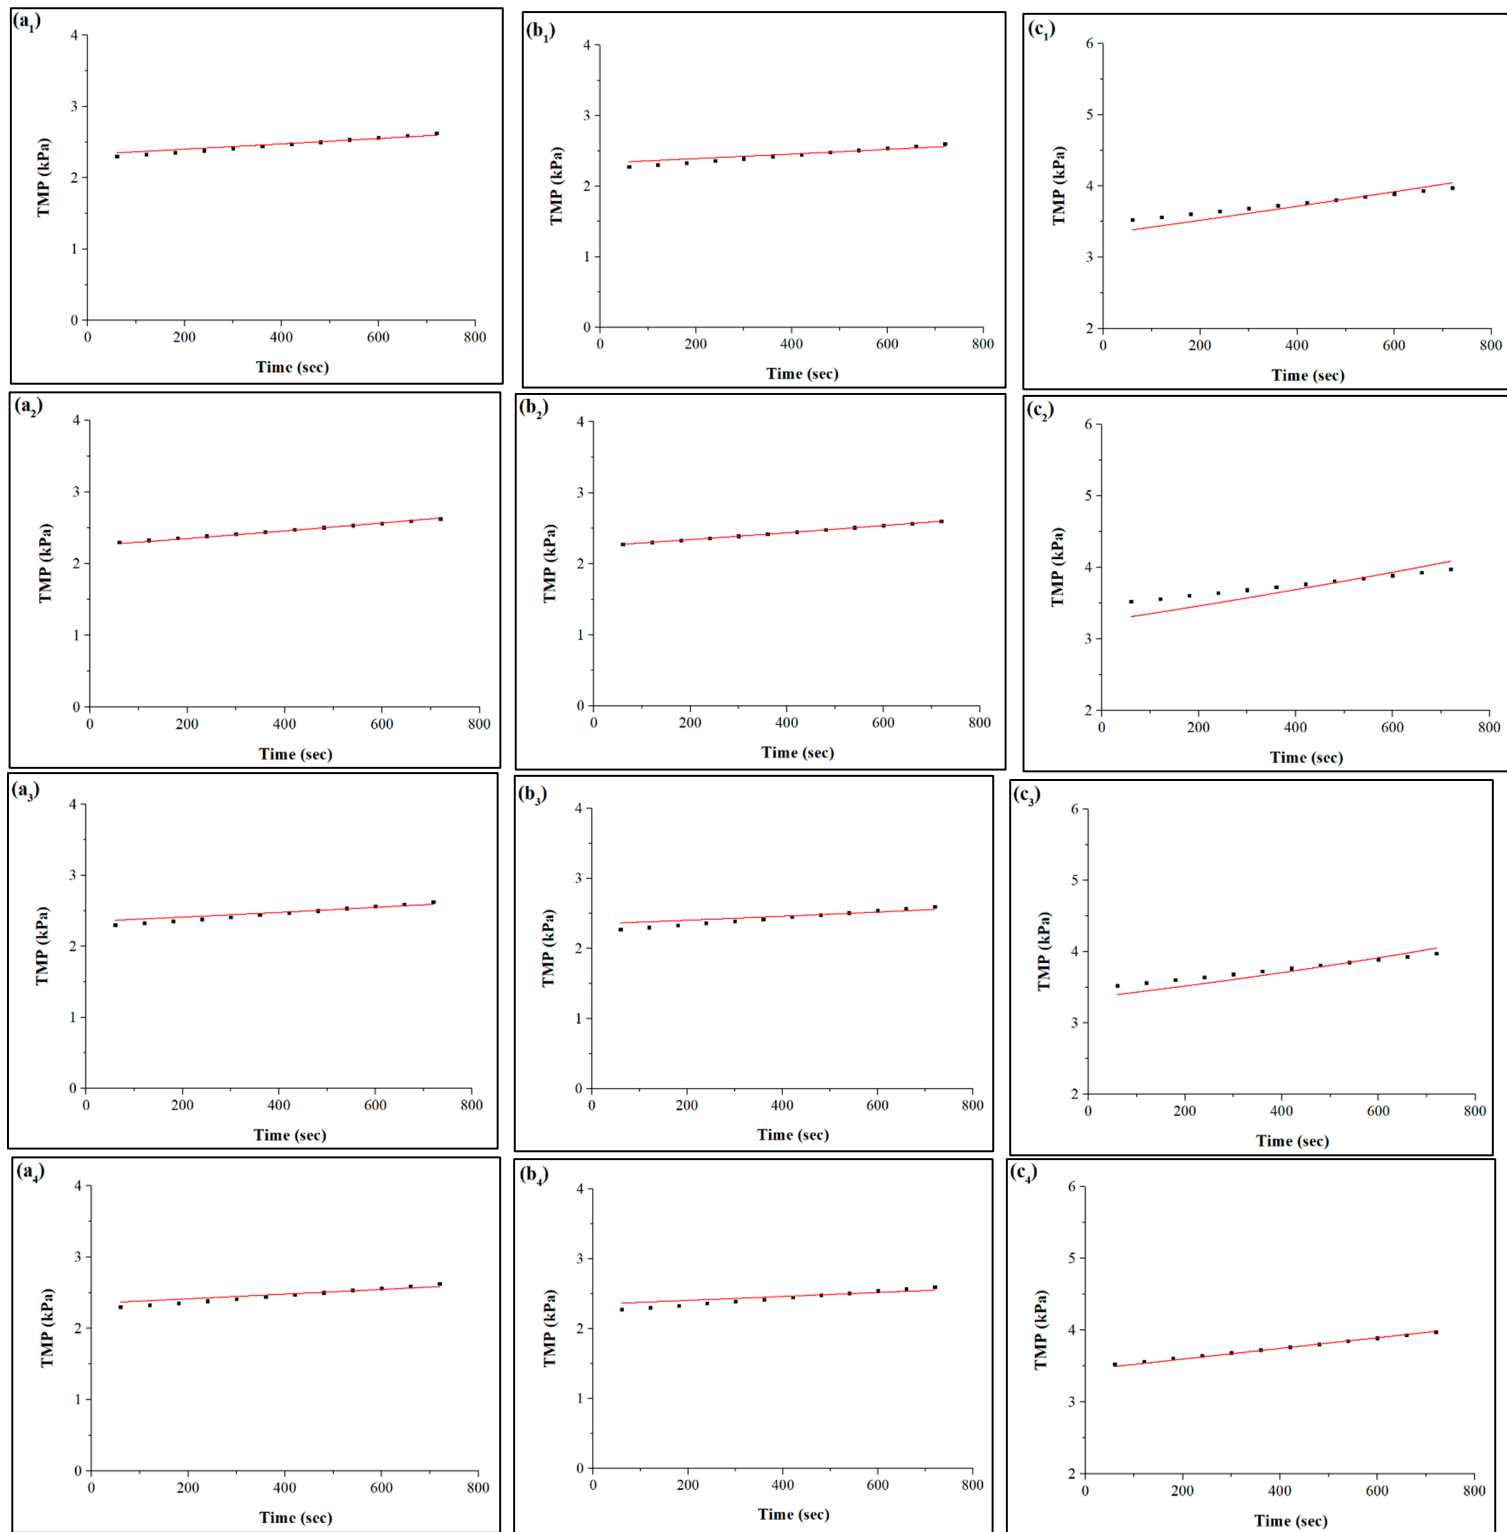

**Fig. S11:** Represents the fitted fouling curve for the fouling solution at 80lmh for cycle 3 filtration; a: S1 solution; b: S2 solution; c: S3 solution (subscript 1, 2, 3 & 4 represents complete, intermediate, standard and cake layer blocking)

### 3. Fitting curves for modified fouling model for the 120lmh

#### 3.1. 1hr filtration

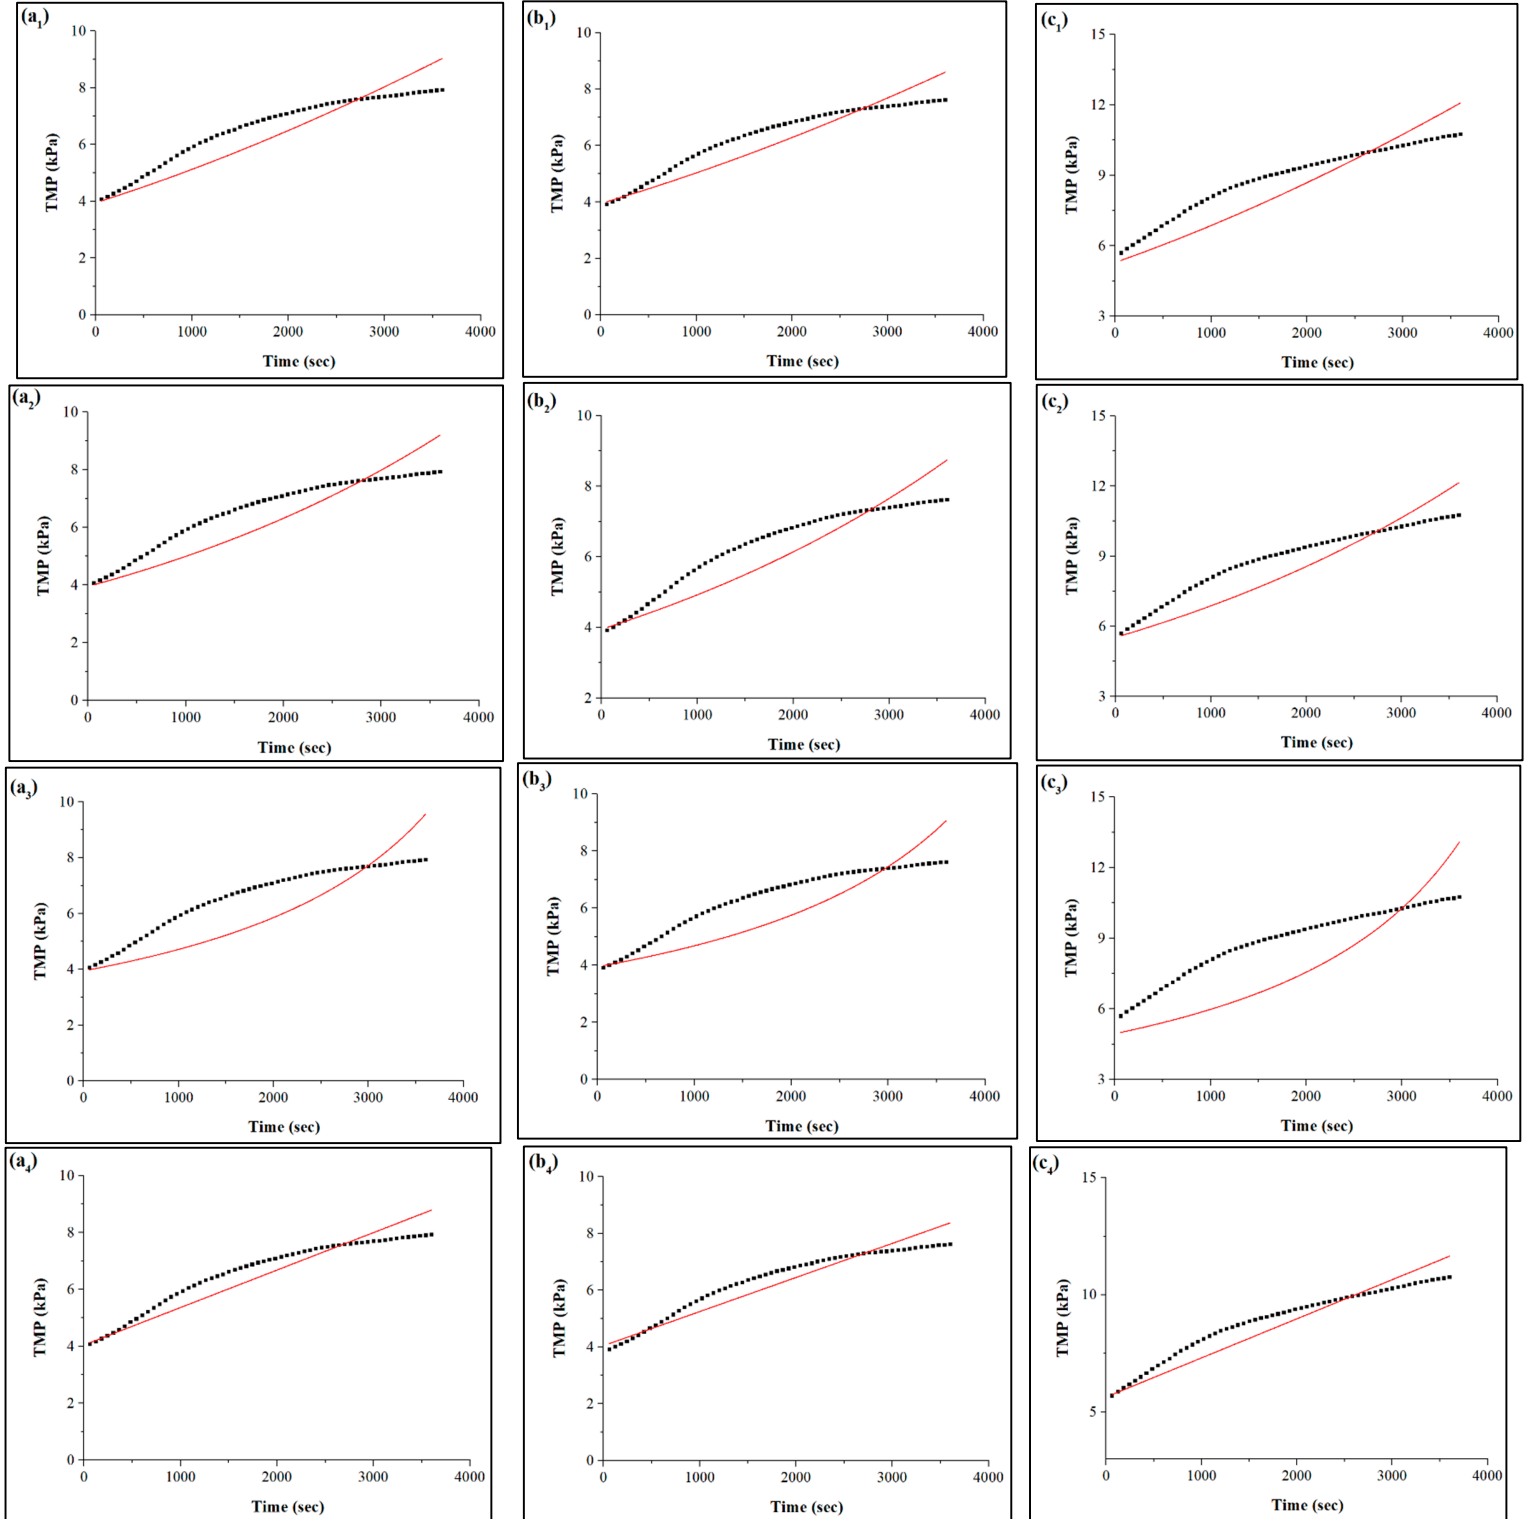

**Fig. S12:** Represents the fitted fouling curve for the fouling solution at 120lmh for 1hr filtration; a: S1 solution; b: S2 solution; c: S3 solution (subscript 1, 2, 3 & 4 represents complete, intermediate, standard and cake layer blocking)

### 3.2. Cycle 1 filtration (120 lmh)

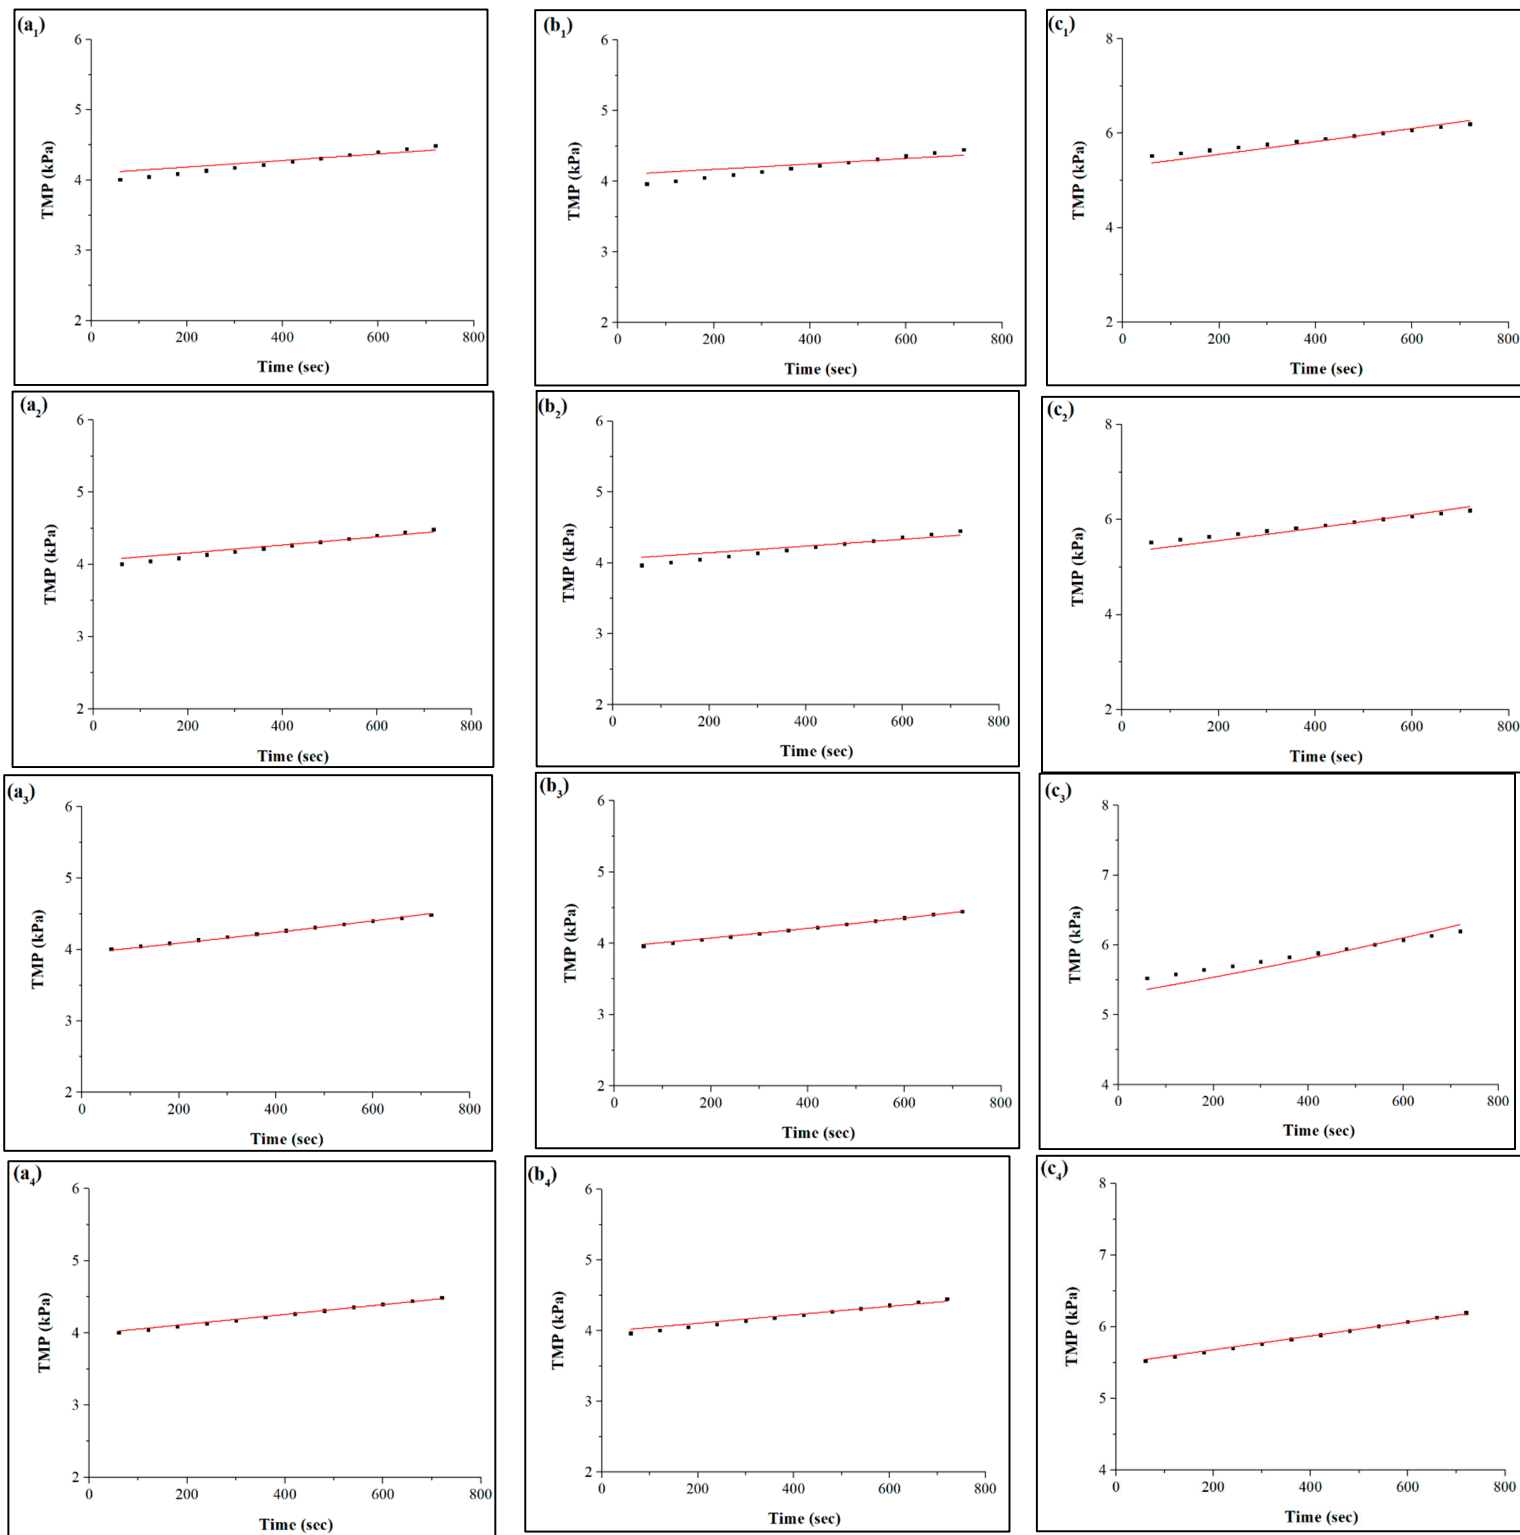

**Fig. S13:** Represents the fitted fouling curve for the fouling solution at 120lmh for cycle 1 filtration; a: S1 solution; b: S2 solution; c: S3 solution (subscript 1, 2, 3 & 4 represents complete, intermediate, standard and cake layer blocking)

### 3.3.Cycle 2 filtration (120 lmh)

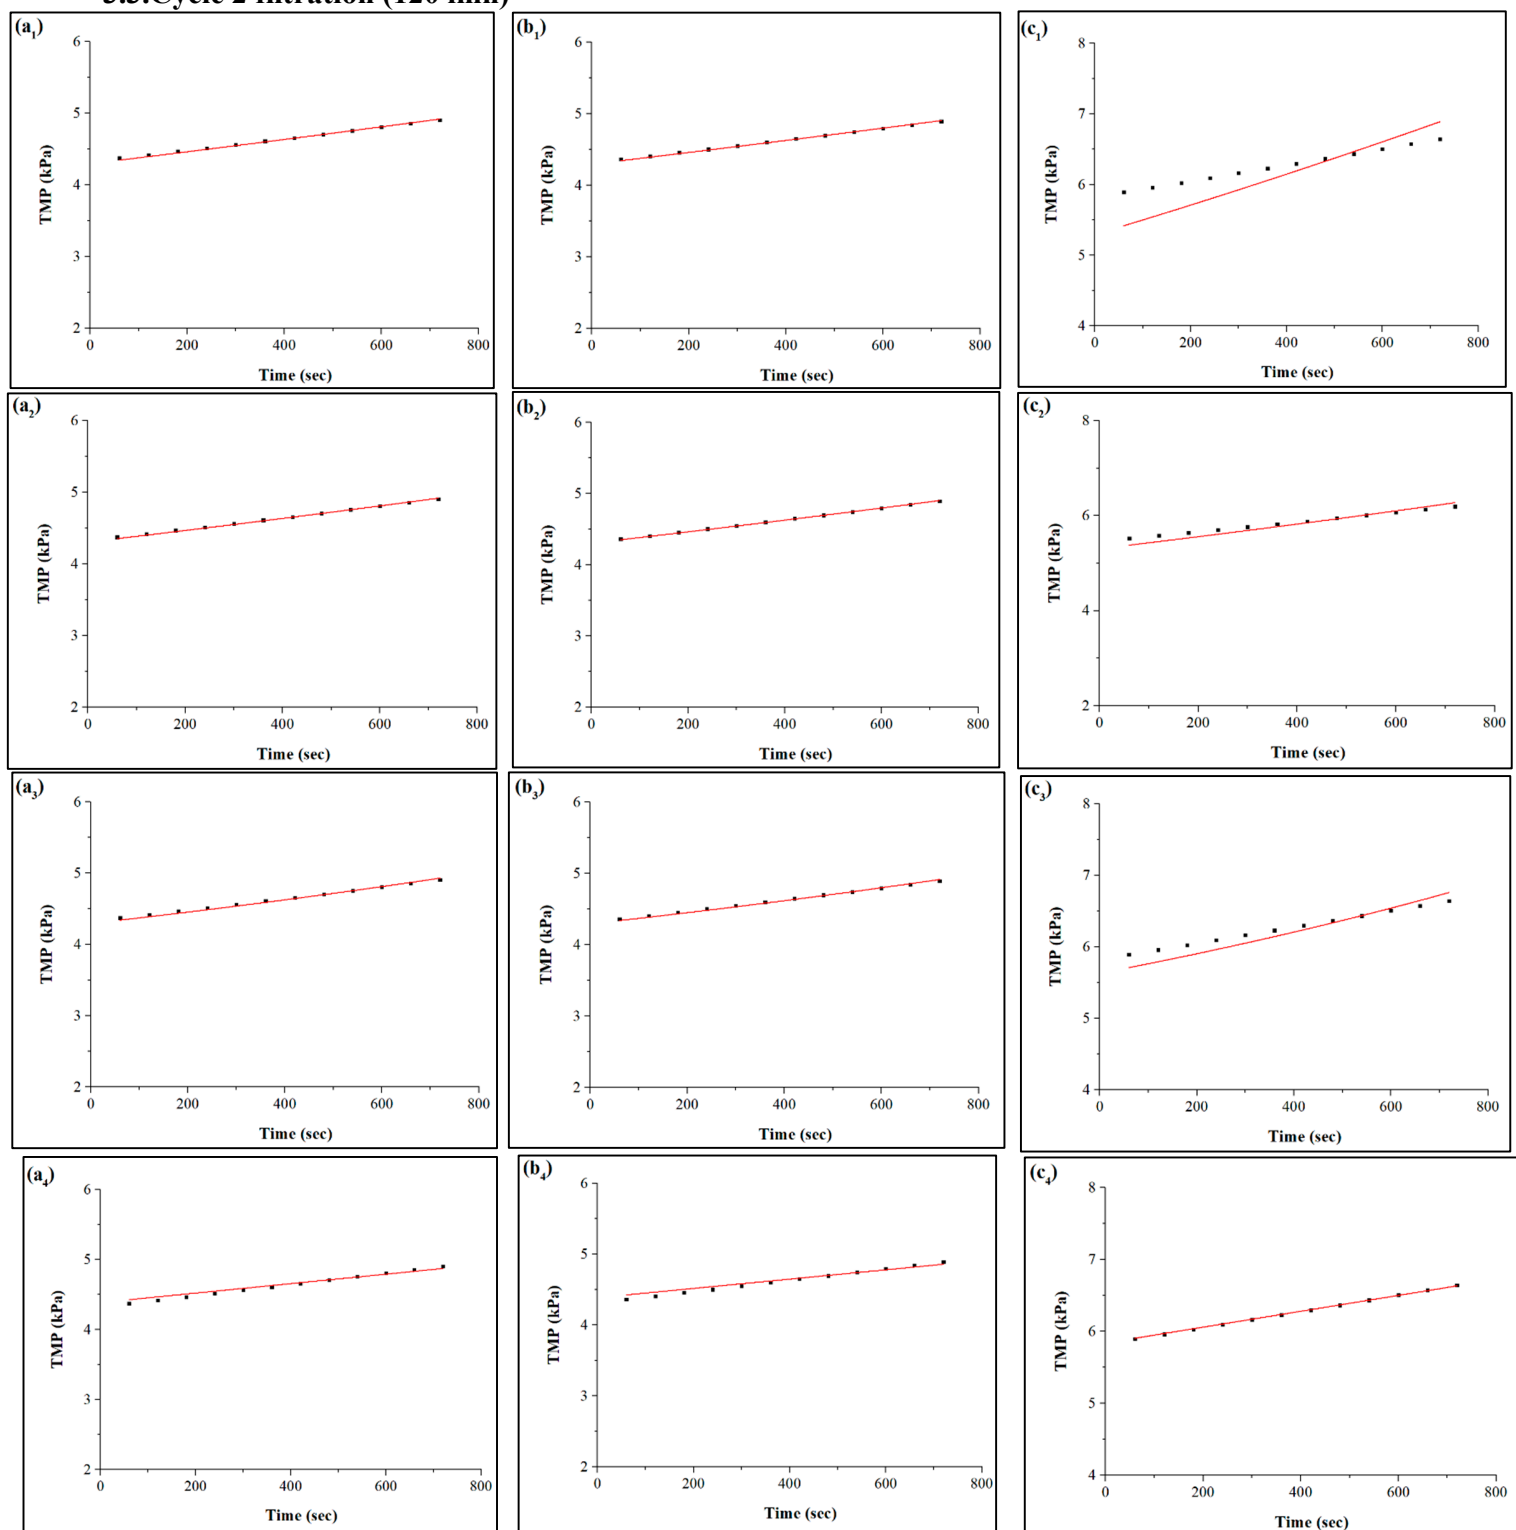

**Fig. S14:** Represents the fitted fouling curve for the fouling solution at 120lmh for cycle 2 filtration; a: S1 solution; b: S2 solution; c: S3 solution (subscript 1, 2,3 & 4 represents complete, intermediate, standard and cake layer blocking)

### 3.4.Cycle 3 filtration (120 lmh)

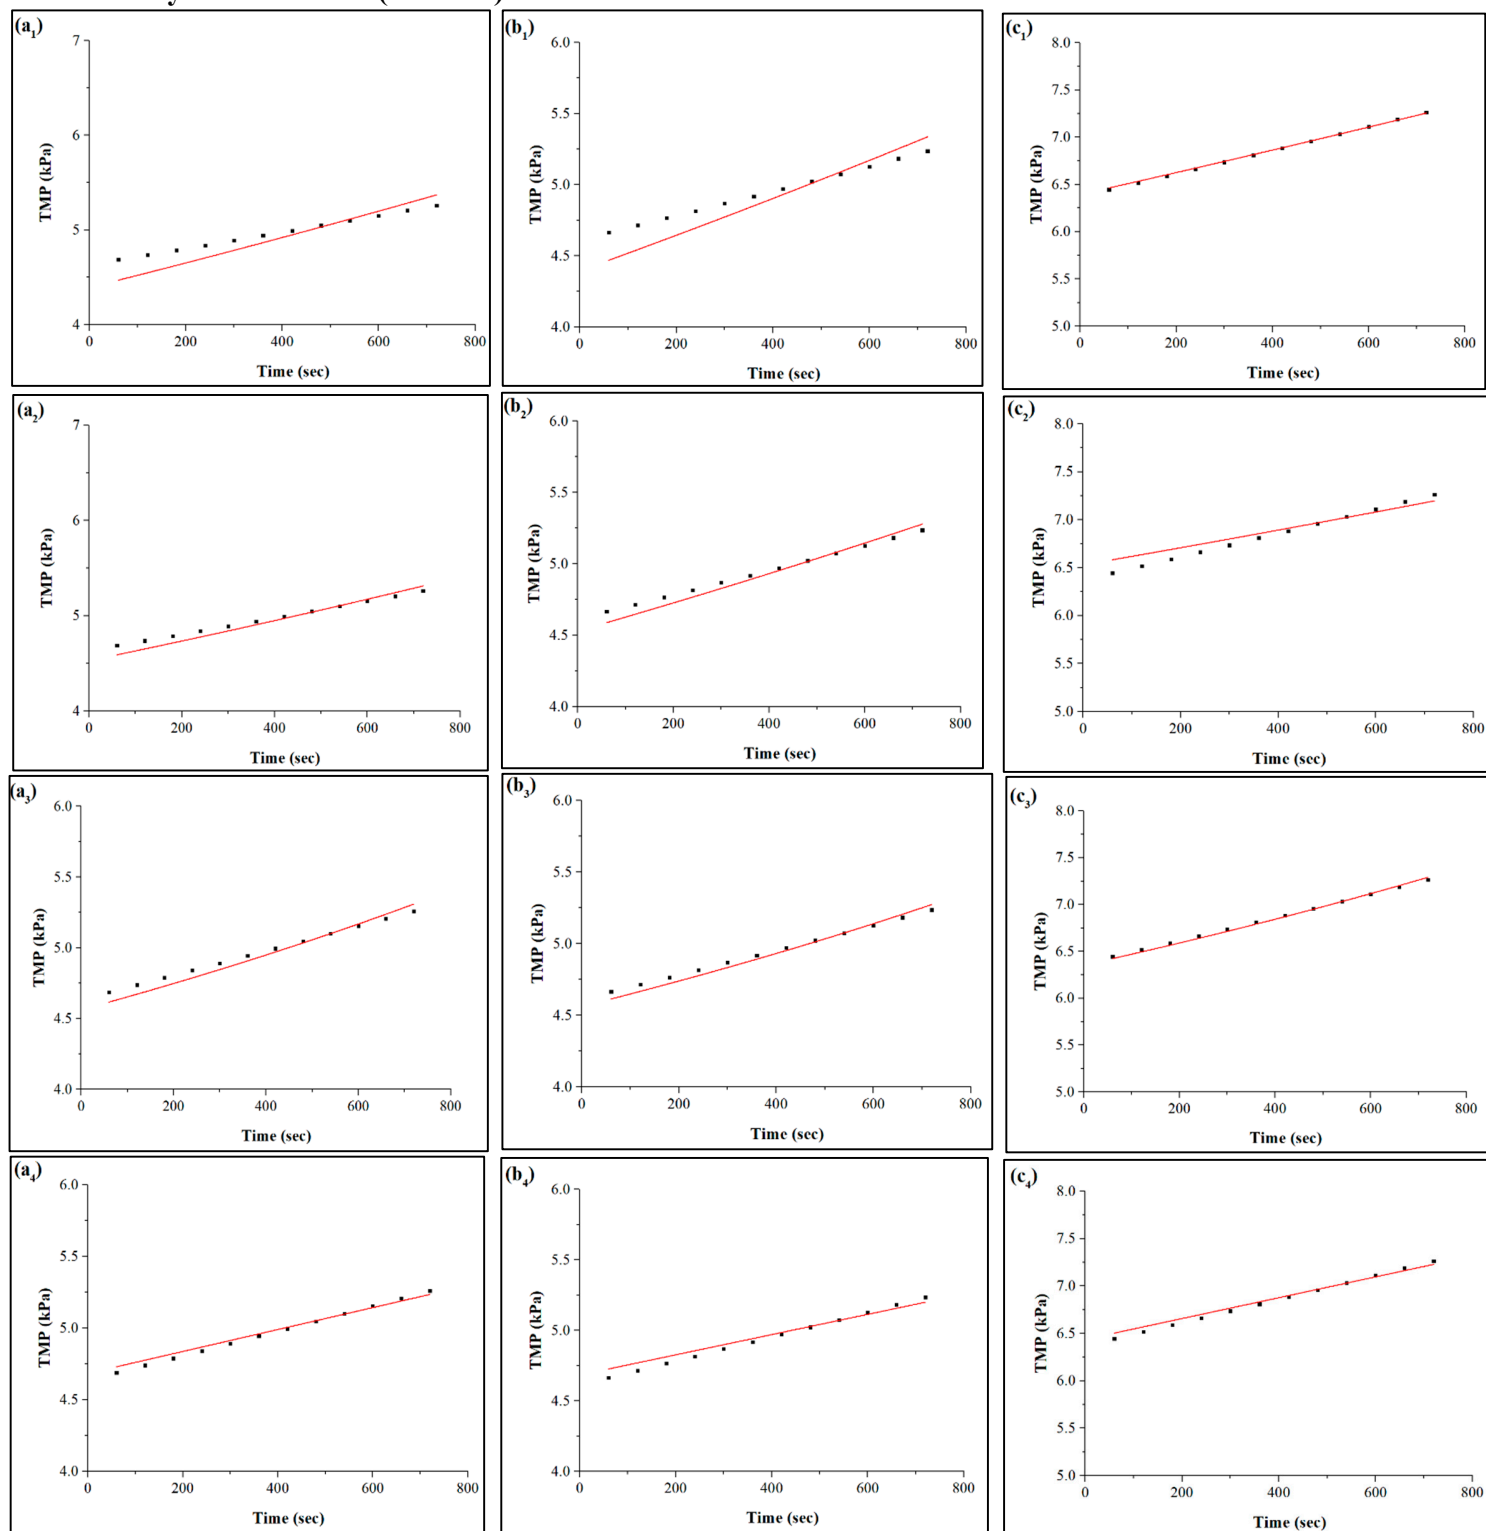

**Fig. S15:** Represents the fitted fouling curve for the fouling solution at 120lmh for cycle 3 filtration; a: S1 solution; b: S2 solution; c: S3 solution (subscript 1, 2,3 & 4 represents complete, intermediate, standard and cake layer blocking)

#### 4. Fitting curves for modified fouling model for the 160lmh

##### 4.1. 1hr Filtration

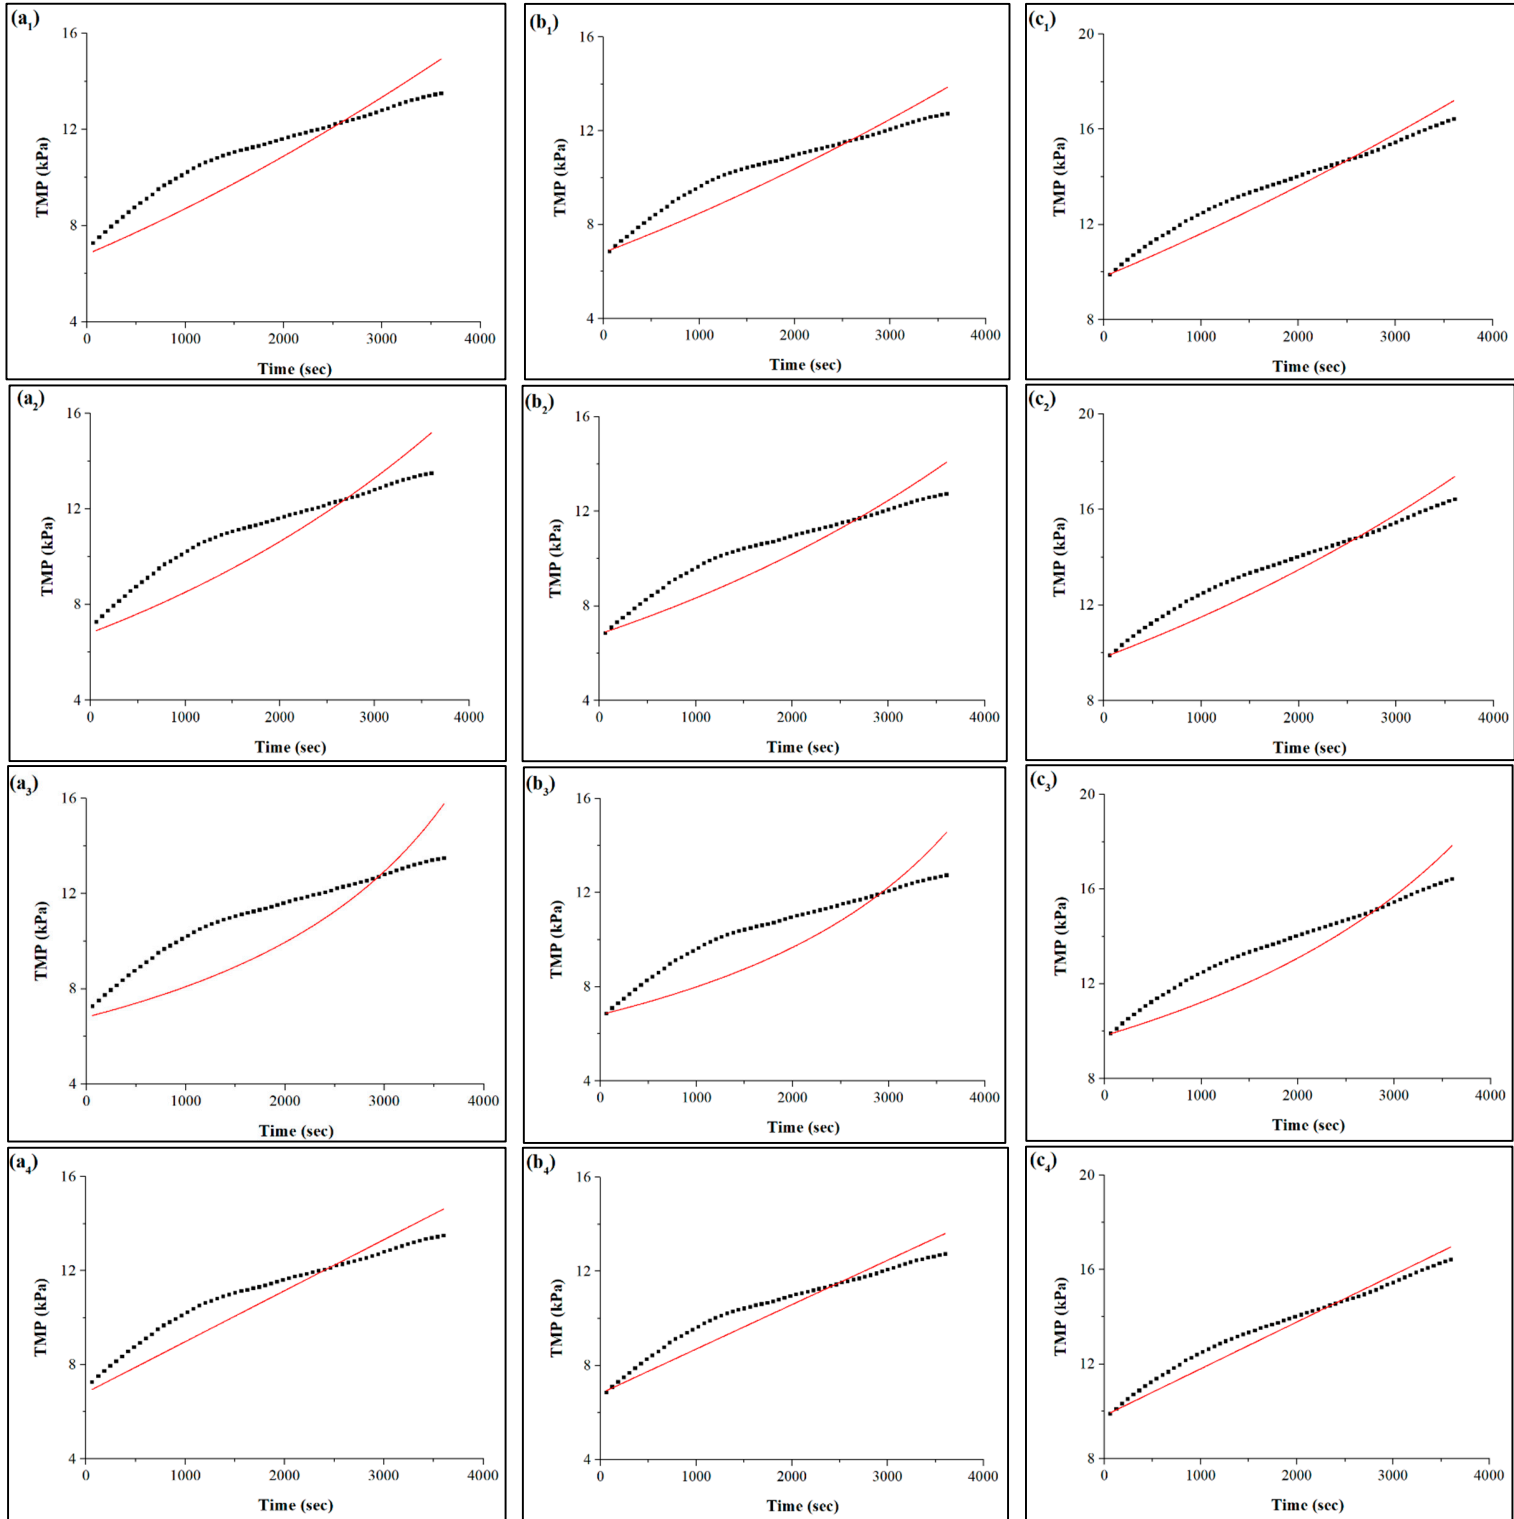

**Fig. S16:** Represents the fitted fouling curve for the fouling solution at 160lmh for 1hr filtration; a: S1 solution; b: S2 solution; c: S3 solution (subscript 1, 2,3 & 4 represents complete, intermediate, standard and cake layer blocking)

## 4.2.Cycle 1 filtration (160 lmh)

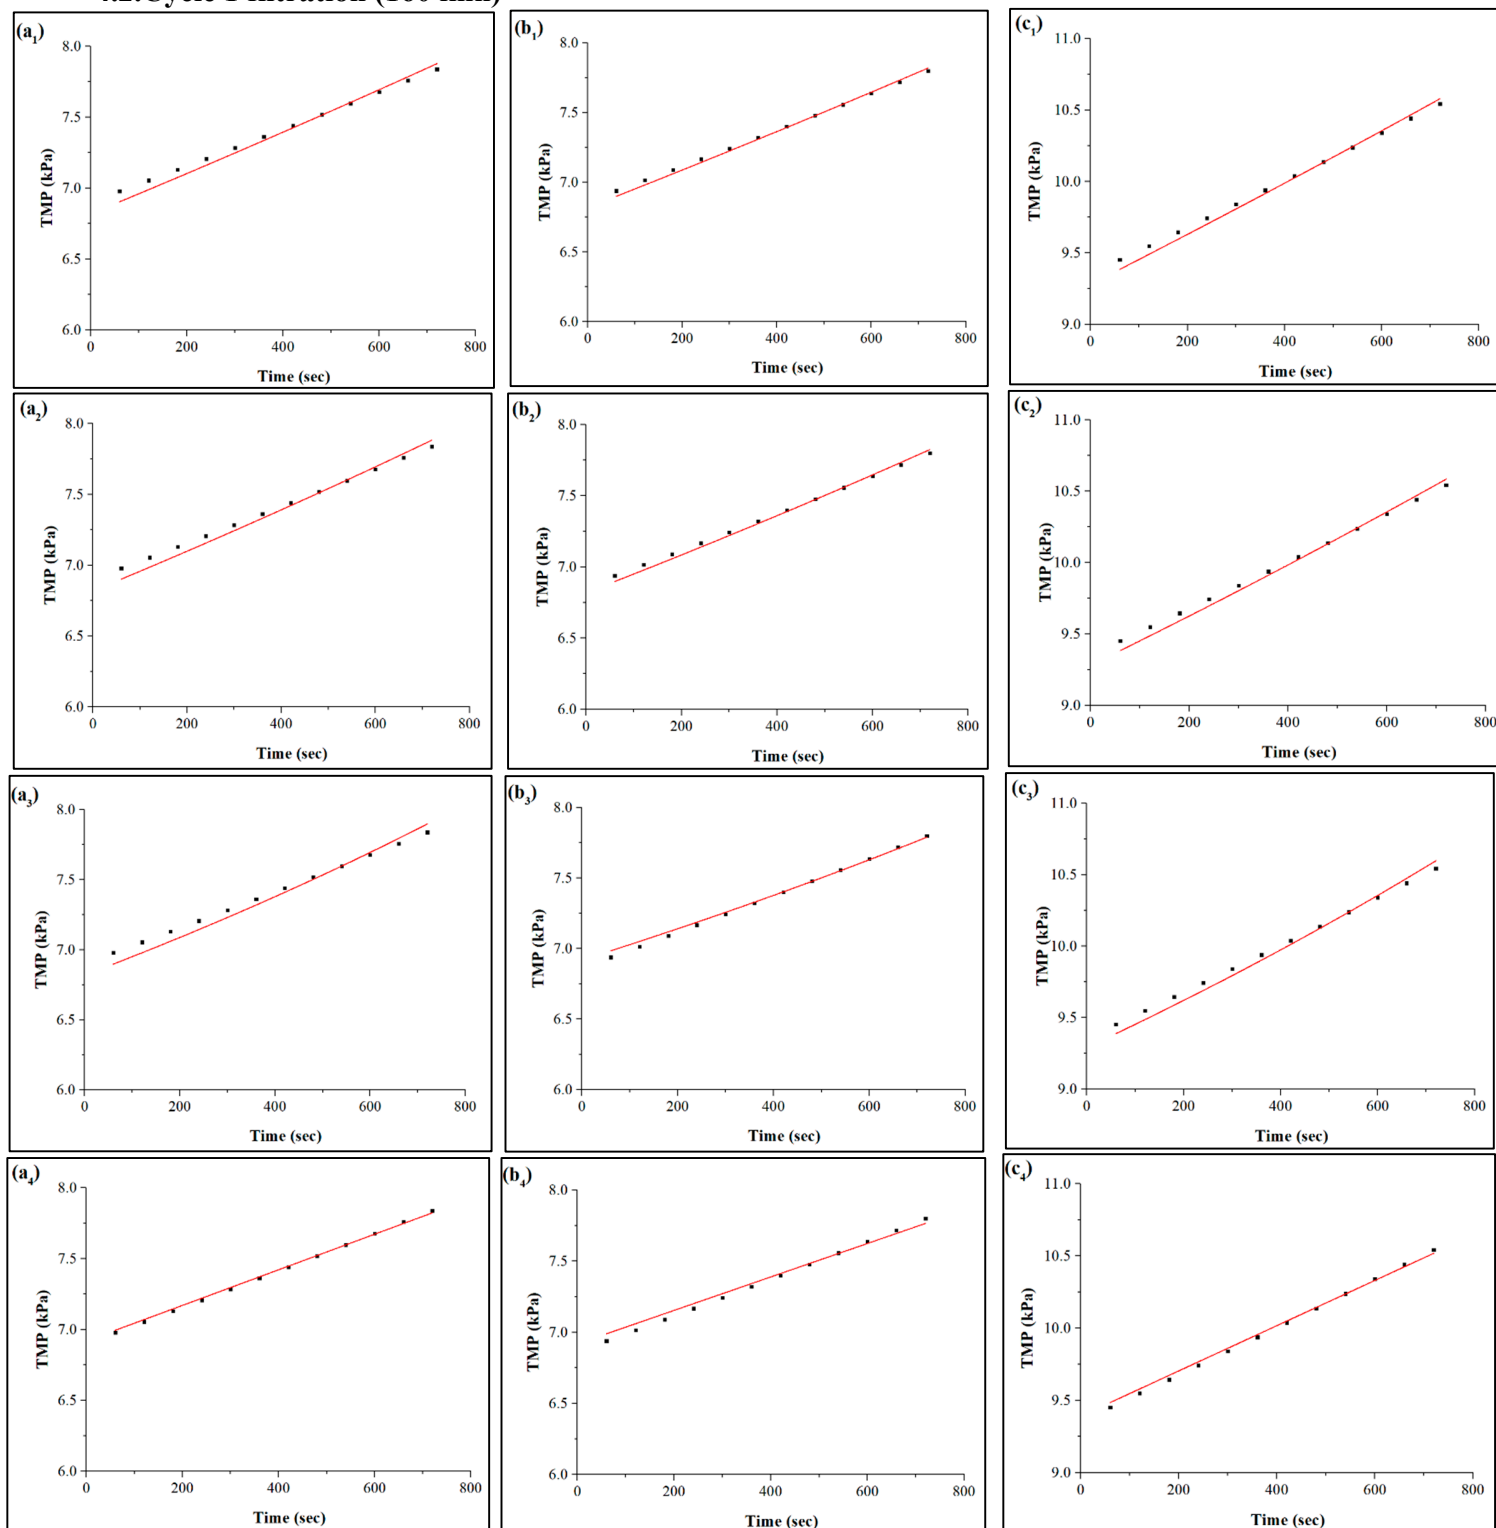

**Fig. S17:** Represents the fitted fouling curve for the fouling solution at 160lmh for Cycle 1 filtration; a: S1 solution; b: S2 solution; c: S3 solution (subscript 1, 2,3 & 4 represents complete, intermediate, standard and cake layer blocking)

### 4.3.Cycle 2 filtration (160 lmh)

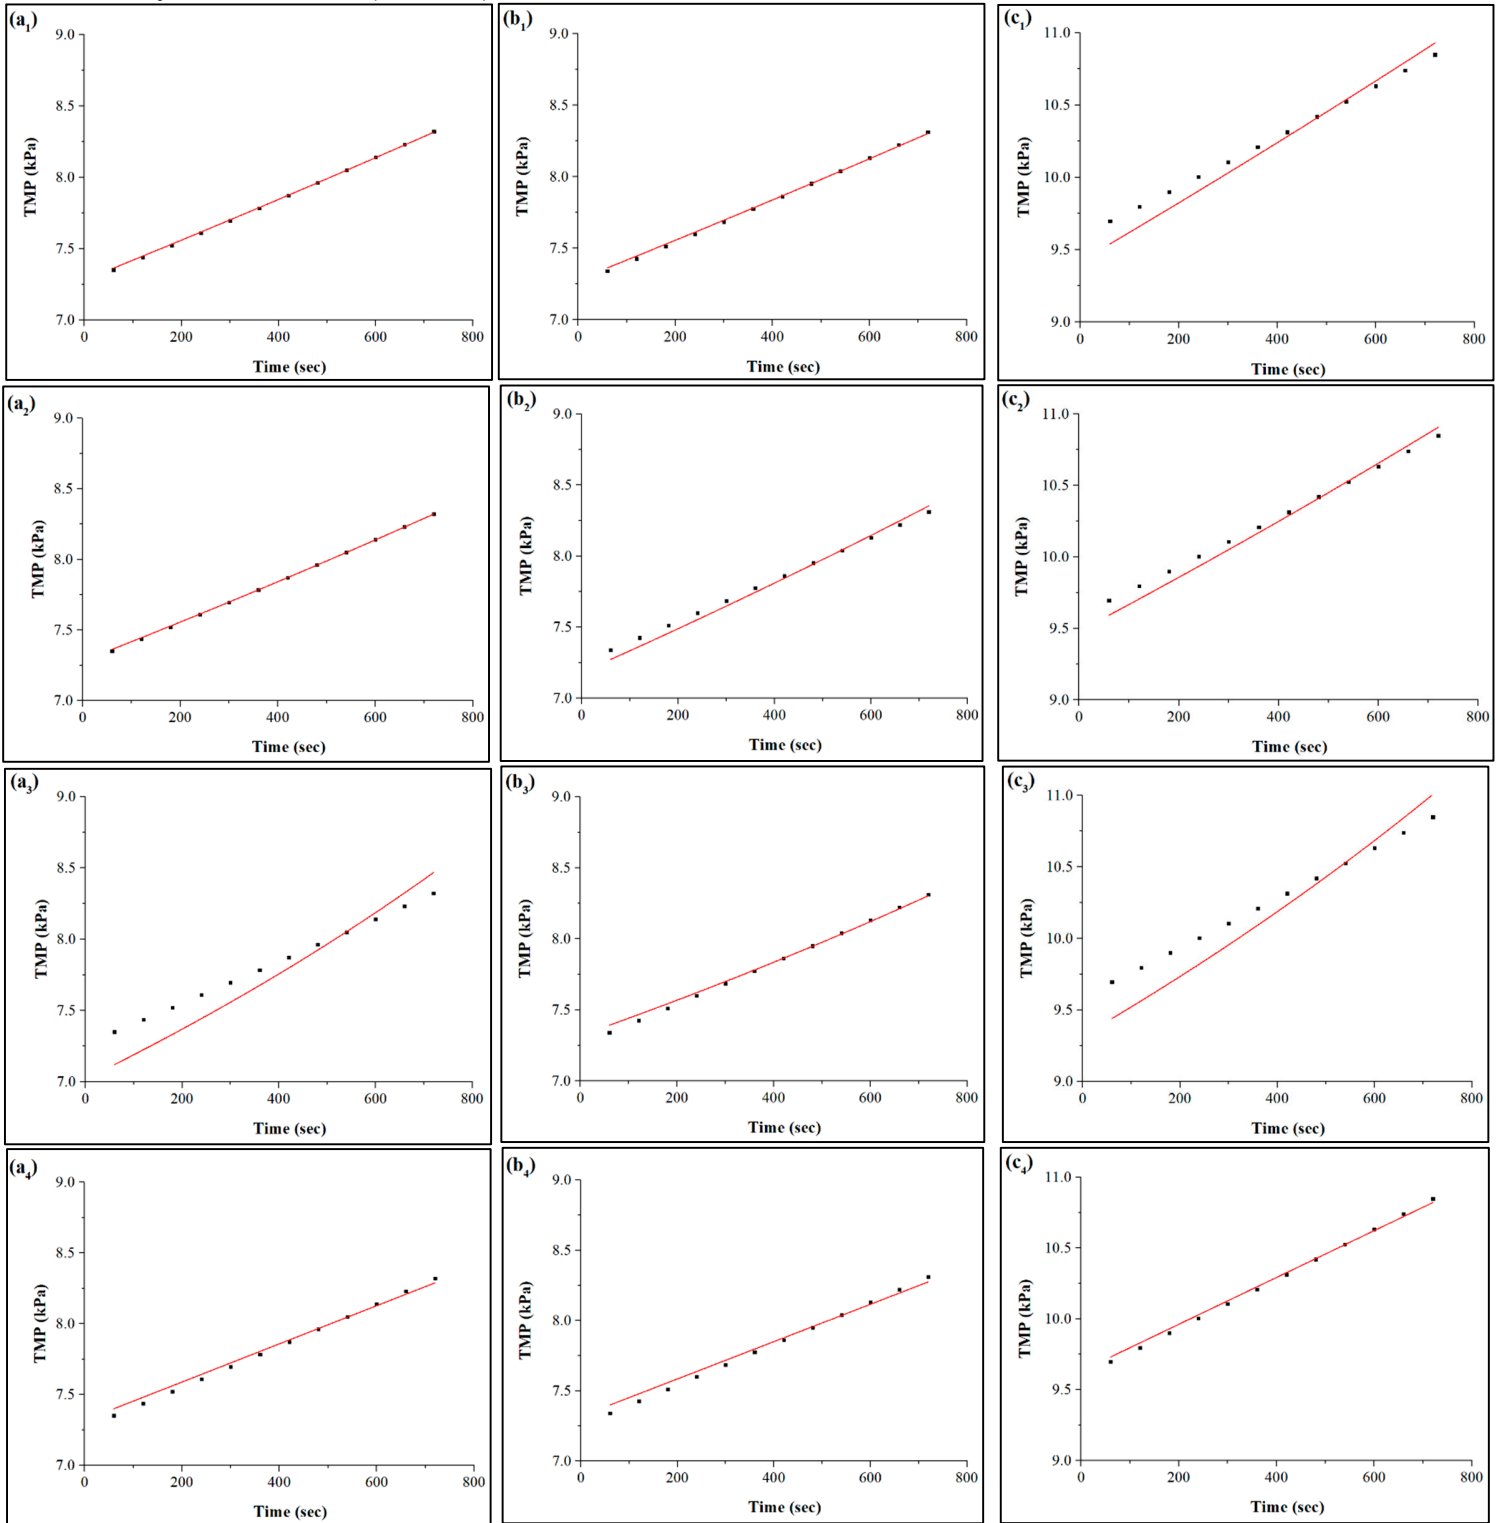

**Fig. S18:** Represents the fitted fouling curve for the fouling solution at 160lmh for Cycle 2 filtration; a: S1 solution; b: S2 solution; c: S3 solution (subscript 1, 2,3 & 4 represents complete, intermediate, standard and cake layer blocking)



#### 4.4.Cycle 3 filtration (160 lmh)

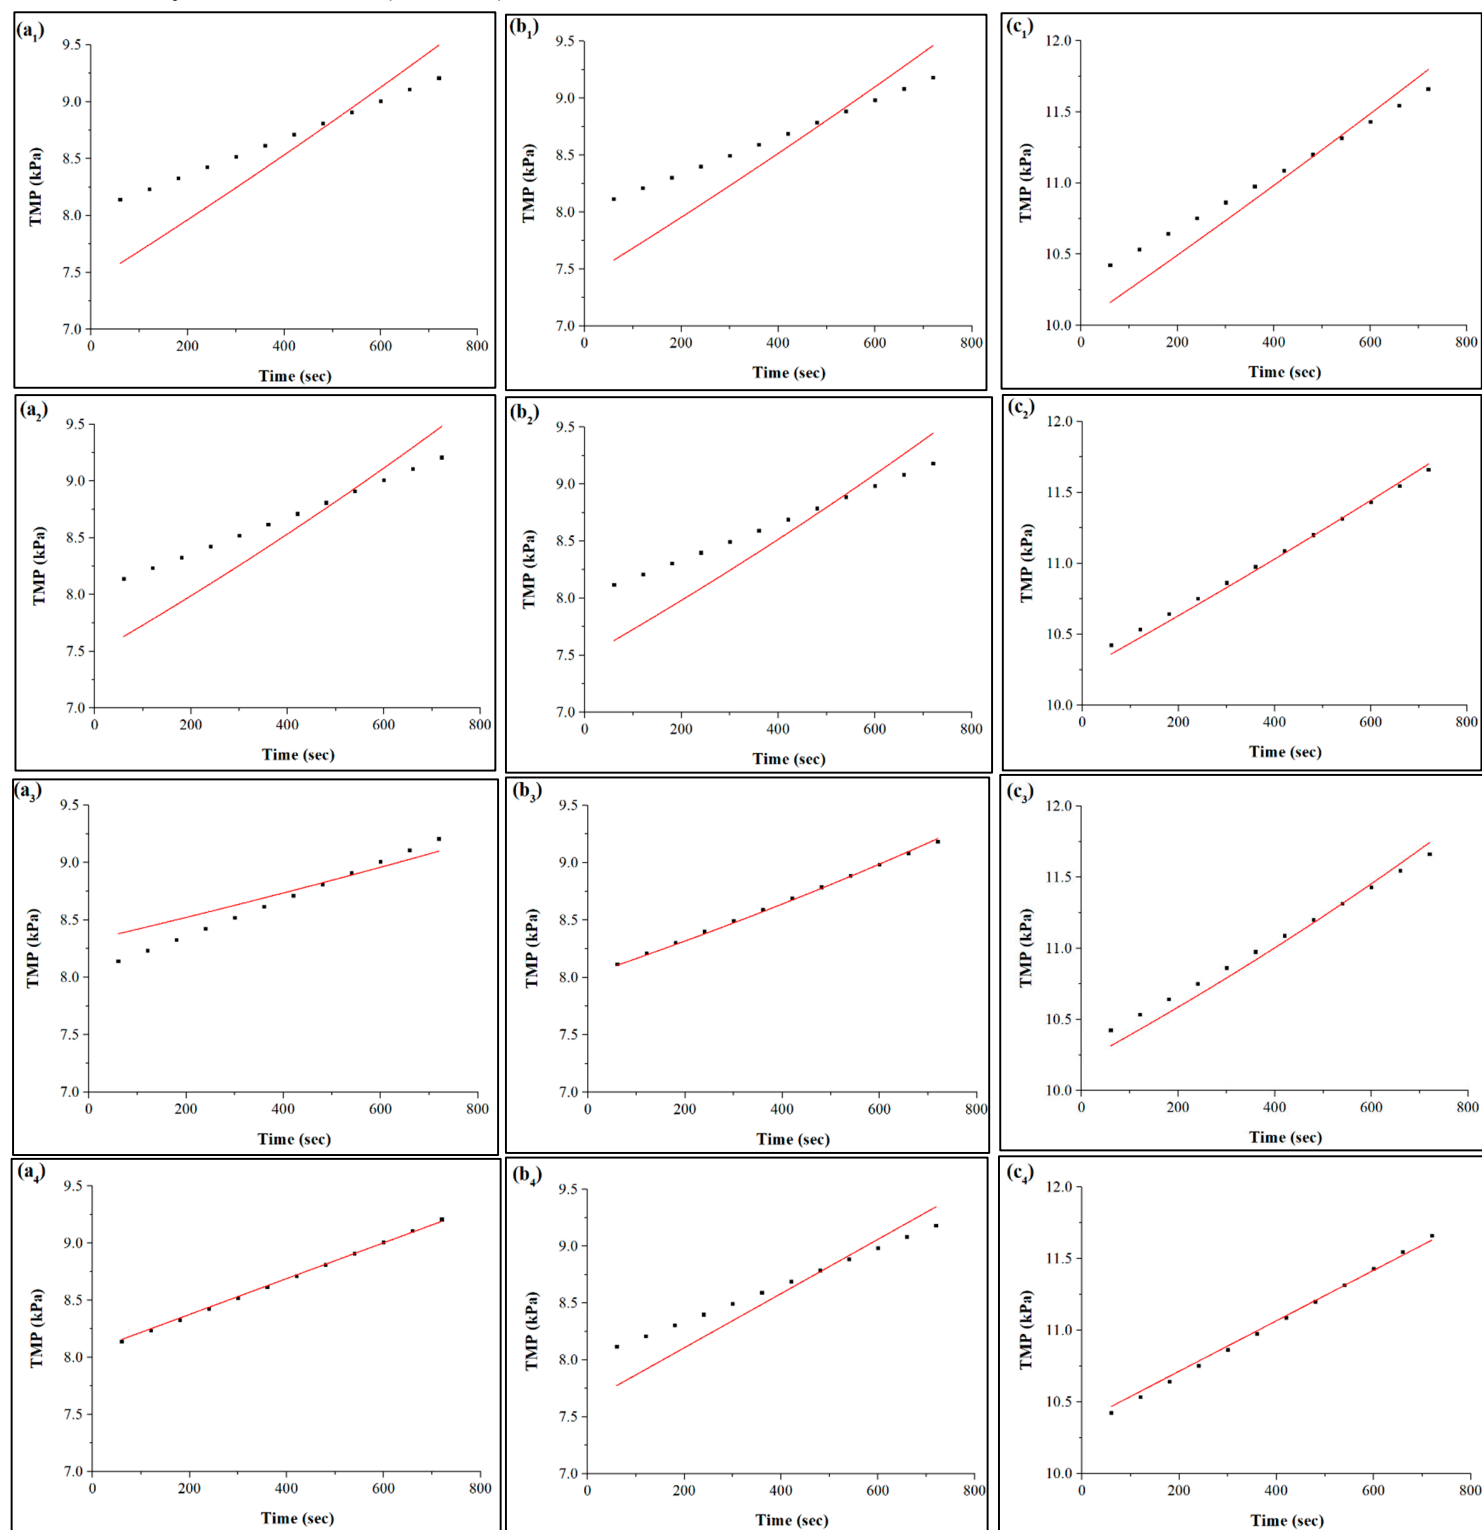

**Fig. S19:** Represents the fitted fouling curve for the fouling solution at 160lmh for Cycle 3 filtration; a: S1 solution; b: S2 solution; c: S3 solution (subscript 1, 2, 3 & 4 represents complete, intermediate, standard and cake layer blocking)

## 5. Fitting curves for modified fouling model for the 120lmh

### 5.1.1hr Filtration

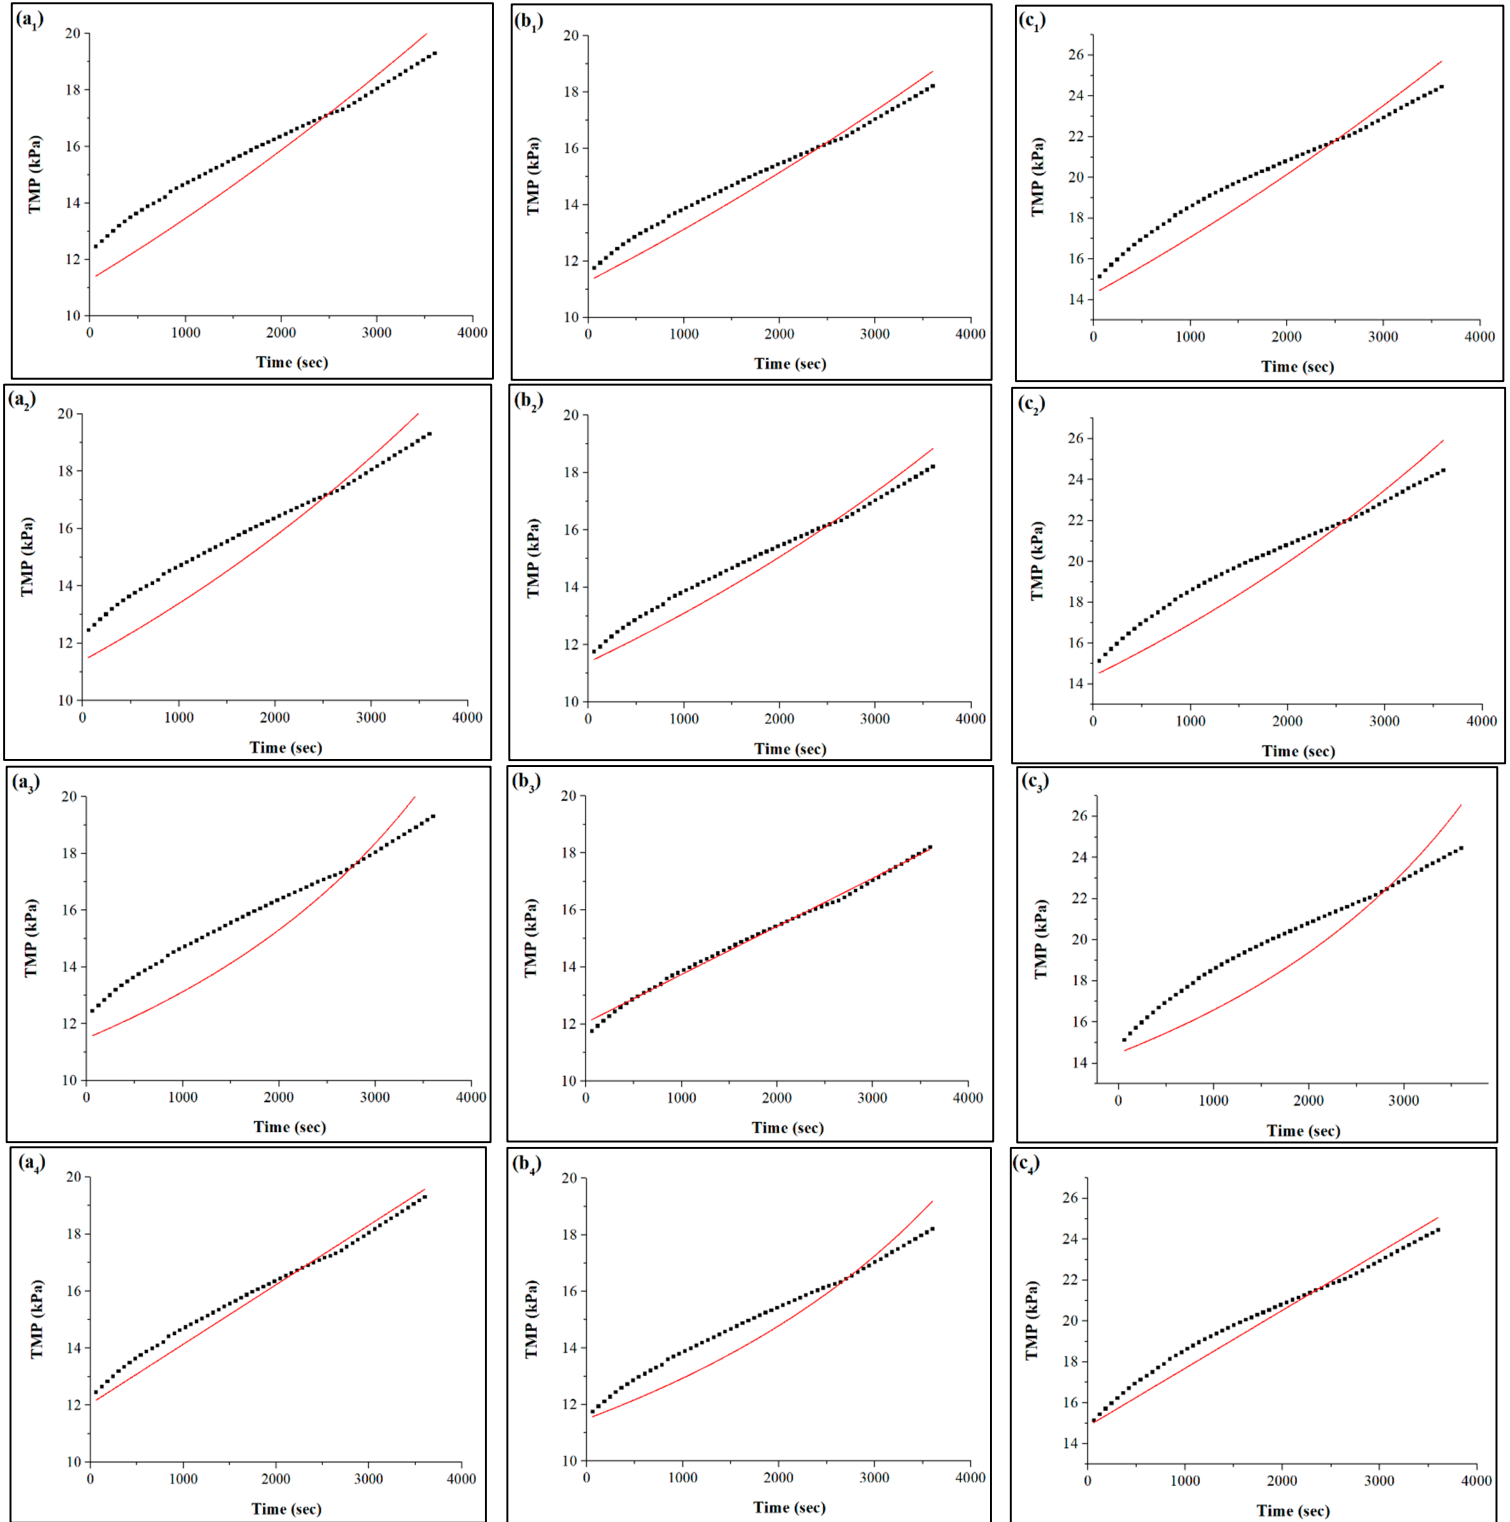

**Fig. S20:** Represents the fitted fouling curve for the fouling solution at 200lmh for 1hr filtration; a: S1 solution; b: S2 solution; c: S3 solution (subscript 1, 2,3 & 4 represents complete, intermediate, standard and cake layer blocking)

## 5.2.Cycle 1 filtration (160 lmh)

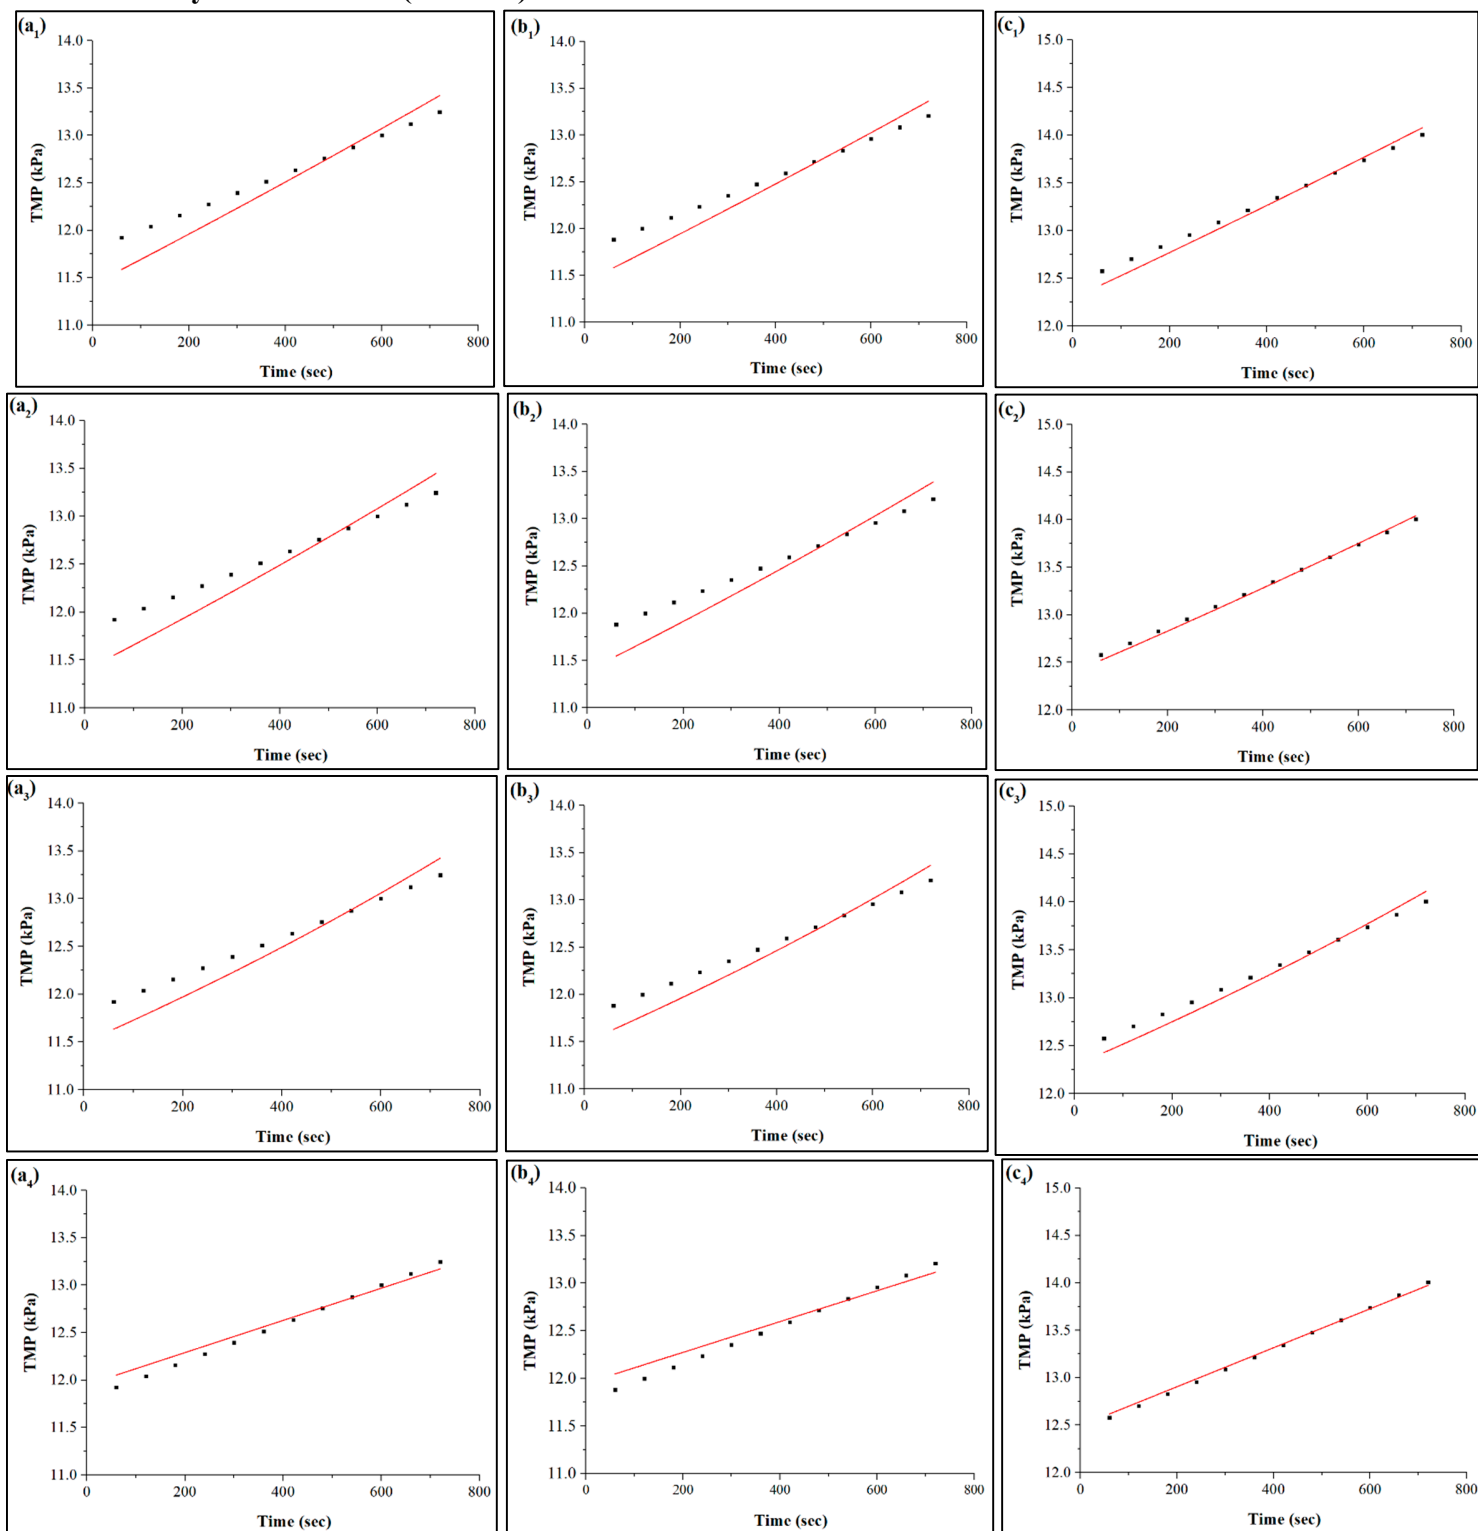

**Fig. S21:** Represents the fitted fouling curve for the fouling solution at 200lmh for Cycle 1 filtration; a: S1 solution; b: S2 solution; c: S3 solution (subscript 1, 2,3 & 4 represents complete, intermediate, standard and cake layer blocking)

### 5.3.Cycle 2 filtration (160 lmh)

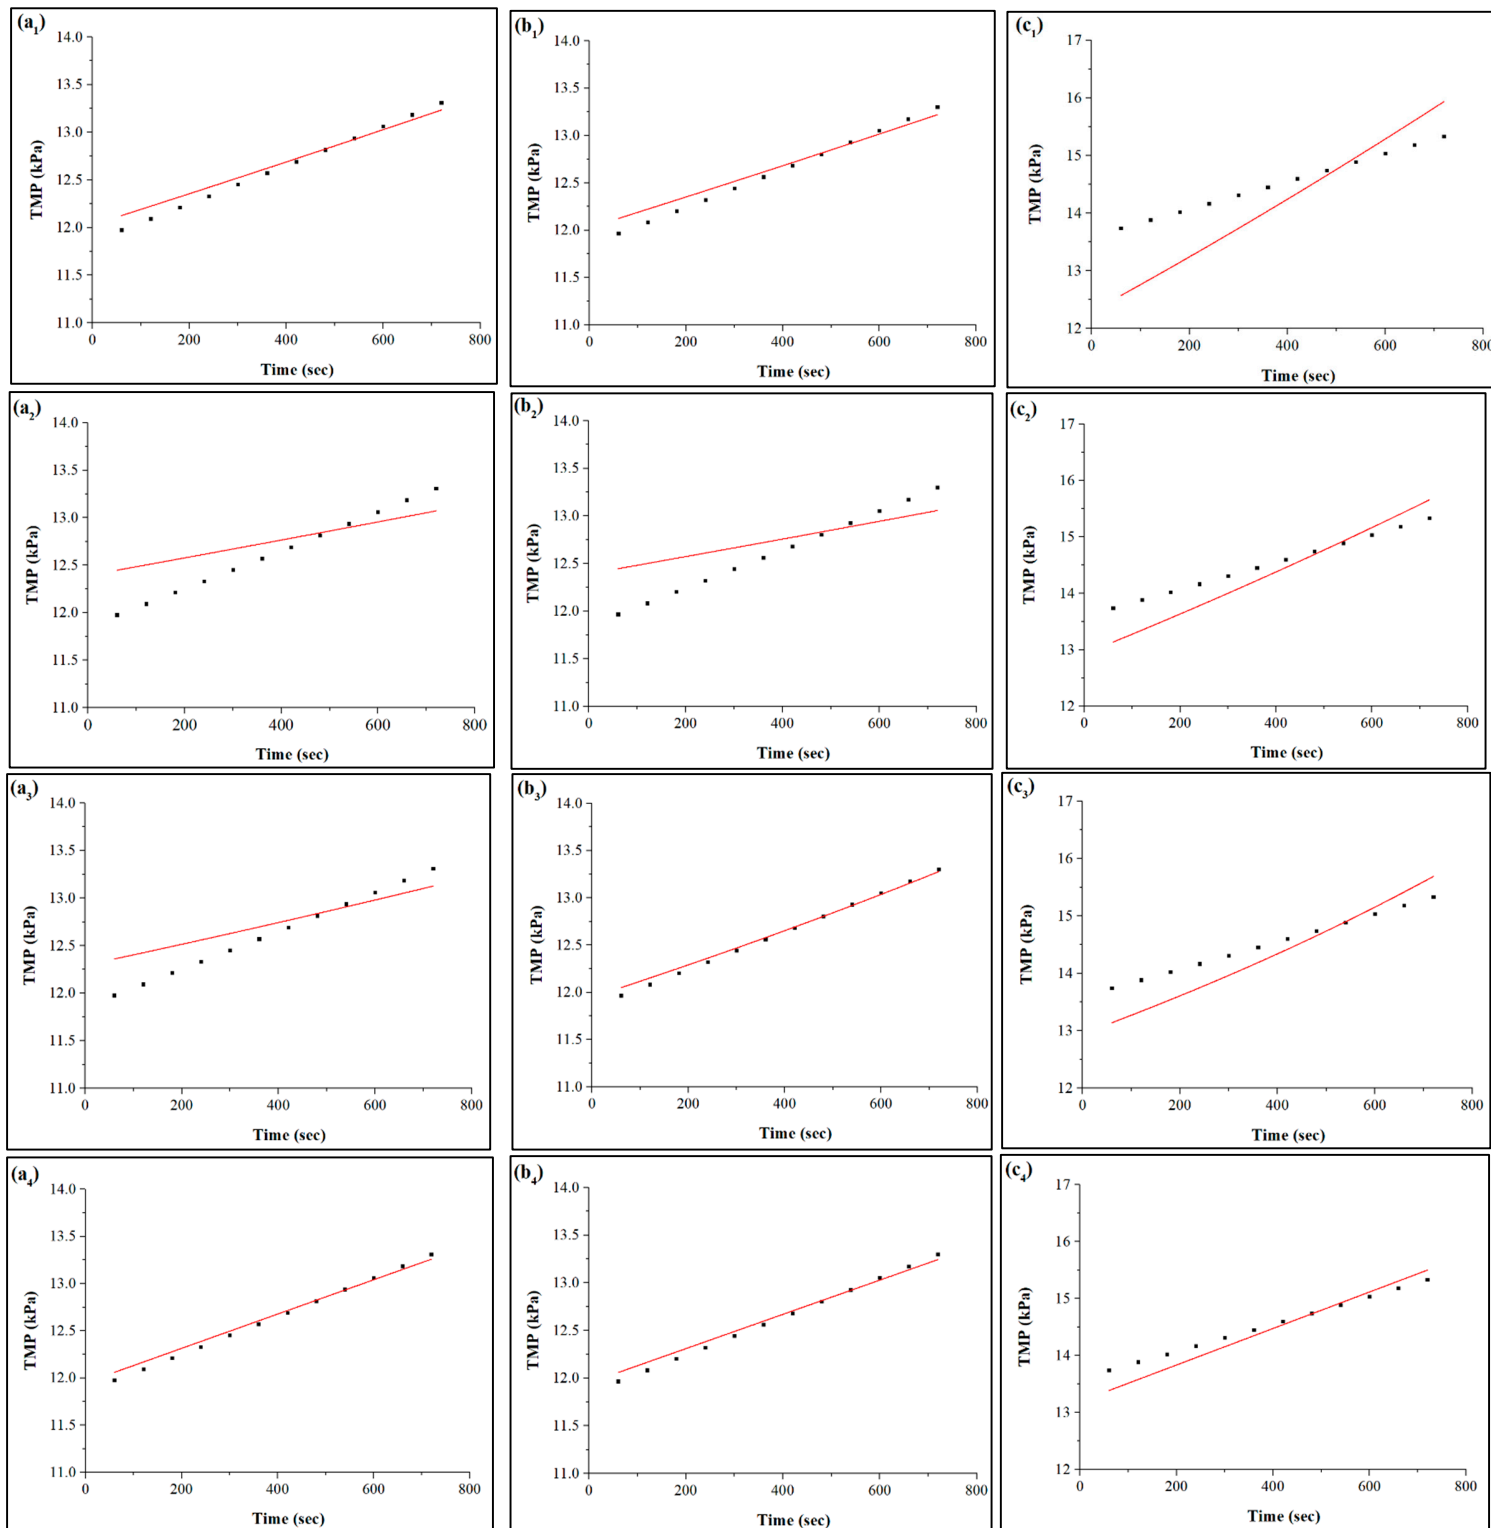

**Fig. S22:** Represents the fitted fouling curve for the fouling solution at 200lmh for Cycle 2 filtration; a: S1 solution; b: S2 solution; c: S3 solution (subscript 1, 2, 3 & 4 represents complete, intermediate, standard and cake layer blocking)

#### 5.4.Cycle 3 filtration (160 lmh)

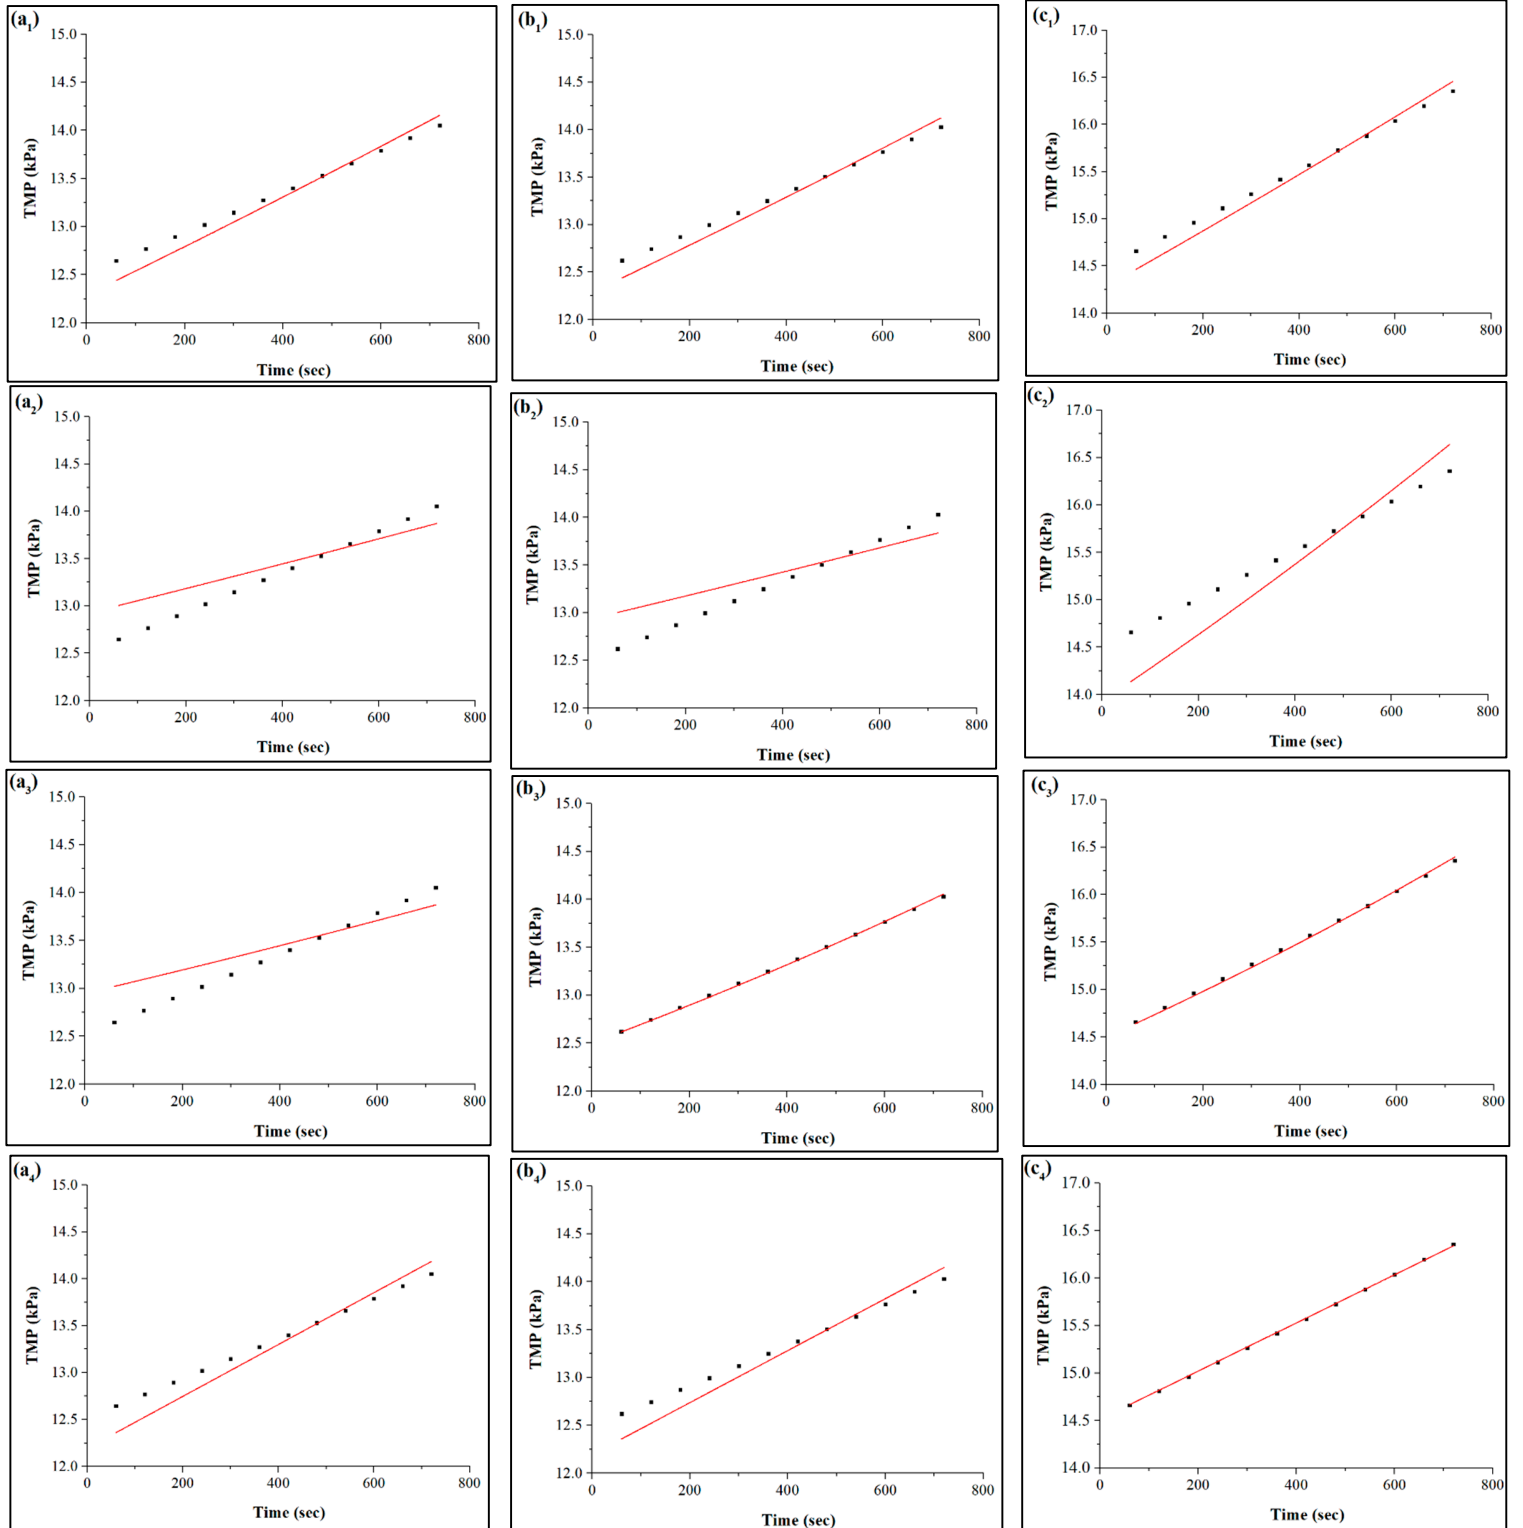

**Fig. S23:** Represents the fitted fouling curve for the fouling solution at 200lmh for Cycle 3 filtration; a: S1 solution; b: S2 solution; c: S3 solution (subscript 1, 2,3 & 4 represents complete, intermediate, standard and cake layer blocking)

1 **Table S3:** Summary of the foulants associated with membrane processes used for surface water treatment.

| Membranes                | Operational Parameters        | Foulants       |                                                                           | Results                                                                                                                                                                                                                                                                                                                                                                                    | Reference  |
|--------------------------|-------------------------------|----------------|---------------------------------------------------------------------------|--------------------------------------------------------------------------------------------------------------------------------------------------------------------------------------------------------------------------------------------------------------------------------------------------------------------------------------------------------------------------------------------|------------|
|                          |                               | Organic        | Inorganic                                                                 |                                                                                                                                                                                                                                                                                                                                                                                            |            |
| PVDF                     | pH: 7; Temp: 23°              | HA             | Ca <sup>2+</sup> , Mg <sup>2+</sup>                                       | <ul style="list-style-type: none"> <li>There is a decrease in the flux of 77% and 33% for Ca<sup>2+</sup> and 53% and 72% for Mg<sup>2+</sup> at ionic strengths of 1 mM and 50 mM, respectively</li> </ul>                                                                                                                                                                                | [1]        |
| CA, PES                  | pH: 6.8 ± 0.2;; Temp: 25°C;   | HA             | Ca <sup>2+</sup> , Mg <sup>2+</sup>                                       | <ul style="list-style-type: none"> <li>The flux decline rate is higher for PES (0.39 for Ca; 0.44 for Mg) than for CA (0.63 for Ca; 0.80 for Mg) due to the strong hydrophobic interactions of the complexes formed from the HA–HA-divalent cation reaction because PES is more hydrophobic (contact angle: 91.9°).</li> </ul>                                                             | [2]        |
| PES (20 kDa)             | P: 105 ± 2.07 kPa             | DOC            | Ca <sup>2+</sup> , Mg <sup>2+</sup>                                       | <ul style="list-style-type: none"> <li>Intermolecular bridging of Ca<sup>2+</sup>, Mg<sup>2+</sup> ion between NOM leads to severe fouling due to strong adhesion forces, resulting in the severe decline in membrane flux..</li> </ul>                                                                                                                                                    | [3]        |
| PVDF (0.22 µm)           | pH: 6.5–7.5; Temp: 35–40°C    | HA             | Fe <sup>3+</sup>                                                          | <ul style="list-style-type: none"> <li>Fe is not effective as a coagulant for the removal of viruses from surface water even at high dosages of 13 mg.L<sup>-1</sup>.</li> </ul>                                                                                                                                                                                                           | [4]        |
| PVDF (0.1 µm),           | pH: 12; Temp: 20°C            | DOC            | Al <sup>3+</sup> , Mn <sup>2+</sup> , Fe <sup>3+</sup> ; Ca <sup>2+</sup> | <ul style="list-style-type: none"> <li>Evaluation of foulant removal by particle size is carried out, showing that Al and Fe have larger particle sizes than Mn, so they were efficiently removed.</li> </ul>                                                                                                                                                                              | [5]        |
| PA (0.6 kDa)             | pH: 6.5–7; Temp: 22±3°C       | HA, FA         | Ca <sup>2+</sup>                                                          | <ul style="list-style-type: none"> <li>PA membranes are used to analyze DOM fouling with and without Ca<sup>2+</sup>. Membrane fouling is not reported only according to hydrophilicity/hydrophobicity, but the surface chemistry is also considered to determine the strength of foulant–membrane interactions.</li> </ul>                                                                | [6]        |
| PES (100 kDa)            | pH: 7.5 ±0.1; Temp: 21± 2°C   | HA; PAC        | Ca <sup>2+</sup>                                                          | <ul style="list-style-type: none"> <li>In the presence of calcium, the TFI and HIFI are at least 2 times higher in PAC+HA than in PAC-treated HA.</li> </ul>                                                                                                                                                                                                                               | [7]        |
| PVDF                     | pH: 7; Temp: 20°C             | DOC            | Na <sup>+</sup> ; Mg <sup>2+</sup>                                        | <ul style="list-style-type: none"> <li>HA fouling with Na<sup>2+</sup> is dominated by electrostatic forces, leading to the formation of a thick layer of HA on the surface with an increase in concentration. Mg<sup>2+</sup> exhibits different behavior, with an increase in the concentration to a critical value causing the aggregation of HA due to electrostatic forces</li> </ul> | [8]        |
| PES, CA, PVDF; (100 kDa) | Temp: 21 ± 2°C; pH: 7.5 ± 0.1 | HA; SA BSA;PAC | Ca <sup>2+</sup>                                                          | <ul style="list-style-type: none"> <li>The mass of PAC increases from 0.65 and 0.41 g.m<sup>-2</sup> to 3.33 and 2.65 g.m<sup>-2</sup> when Ca<sup>2+</sup> combines with HA and SA, respectively, due to the interaction between the carboxylate moieties of HA and SA with Ca<sup>2+</sup>, further strengthening adsorption.</li> </ul>                                                 | [9]        |
| PVC (50 kDa)             | pH: 6.8 ± 0.1; Temp: 23-25°C  | HA             | Ca <sup>2+</sup>                                                          | <ul style="list-style-type: none"> <li>HA fouling is dependent on Ca<sup>2+</sup> interactions. As the Ca<sup>2+</sup> concentration increases, membrane fouling increases due to chelation and a decrease in the interaction energy with HA.</li> </ul>                                                                                                                                   | [10]       |
| PVDF                     | pH:8 Temp: 23-25°C            | HA             | Ca <sup>2+</sup> , Al <sup>3+</sup> , Mn <sup>2+</sup> , Fe <sup>3+</sup> | <ul style="list-style-type: none"> <li>Applied the participation equation to elucidate the dual behavior of Al<sup>3+</sup> with HA and Ca<sup>2+</sup>, while bridging and agglomeration with other foulants.</li> </ul>                                                                                                                                                                  | This study |

## 4 References

- 5 1. Miao, R., et al., *A comparison of the roles of Ca<sup>2+</sup> and Mg<sup>2+</sup> on membrane fouling with humic*  
6 *acid: Are there any differences or similarities?* Journal of Membrane Science, 2018. **545**: p. 81-87.
- 7 2. Wang, L.-F., et al., *Probing the roles of Ca<sup>2+</sup> and Mg<sup>2+</sup> in humic acids-induced ultrafiltration*  
8 *membrane fouling using an integrated approach.* Water Research, 2015. **81**: p. 325-332.
- 9 3. Ahn, W.-Y., A.G. Kalinichev, and M.M. Clark, *Effects of background cations on the fouling of*  
10 *polyethersulfone membranes by natural organic matter: Experimental and molecular modeling*  
11 *study.* Journal of Membrane Science, 2008. **309**(1): p. 128-140.
- 12 4. Tanneru, C.T. and S. Chellam, *Mechanisms of virus control during iron electrocoagulation –*  
13 *Microfiltration of surface water.* Water Research, 2012. **46**(7): p. 2111-2120.
- 14 5. Yamamura, H., K. Kimura, and Y. Watanabe, *Mechanism Involved in the Evolution of Physically*  
15 *Irreversible Fouling in Microfiltration and Ultrafiltration Membranes Used for Drinking Water*  
16 *Treatment.* Environmental Science & Technology, 2007. **41**(19): p. 6789-6794.
- 17 6. Mustafa, G., et al., *New insights into the fouling mechanism of dissolved organic matter applying*  
18 *nanofiltration membranes with a variety of surface chemistries.* Water Research, 2016. **93**: p. 195-  
19 204.
- 20 7. Shao, S., et al., *Deposition of powdered activated carbon (PAC) on ultrafiltration (UF) membrane*  
21 *surface: influencing factors and mechanisms.* Journal of Membrane Science, 2017. **530**: p. 104-111.
- 22 8. Miao, R., et al., *Evaluating the effects of sodium and magnesium on the interaction processes of*  
23 *humic acid and ultrafiltration membrane surfaces.* Journal of Membrane Science, 2017. **526**: p. 131-  
24 137.
- 25 9. Shao, S., et al., *Combined influence by humic acid (HA) and powdered activated carbon (PAC)*  
26 *particles on ultrafiltration membrane fouling.* Journal of Membrane Science, 2016. **500**: p. 99-105
- 27 10. Lin, T., Z. Lu, and W. Chen, *Interaction mechanisms of humic acid combined with calcium ions on*  
28 *membrane fouling at different conditions in an ultrafiltration system.* Desalination, 2015. **357**: p. 26-  
29 35.
